# Supplementary material for: Temperature-dependent jumonji demethylase modulates flowering time by targeting H3K36me2/3 in Brassica rapa
Source: PubMed Central journal article supplement (PMC11211497; doi:10.1038/s41467-024-49721-z), 2024-06-28
Supplement: 41467_2024_49721_MOESM1_ESM.pdf [file 41467_2024_49721_MOESM1_ESM.pdf]

Supplementary Figure 1. Genetic structures of 210 *Brassica rapa* varieties

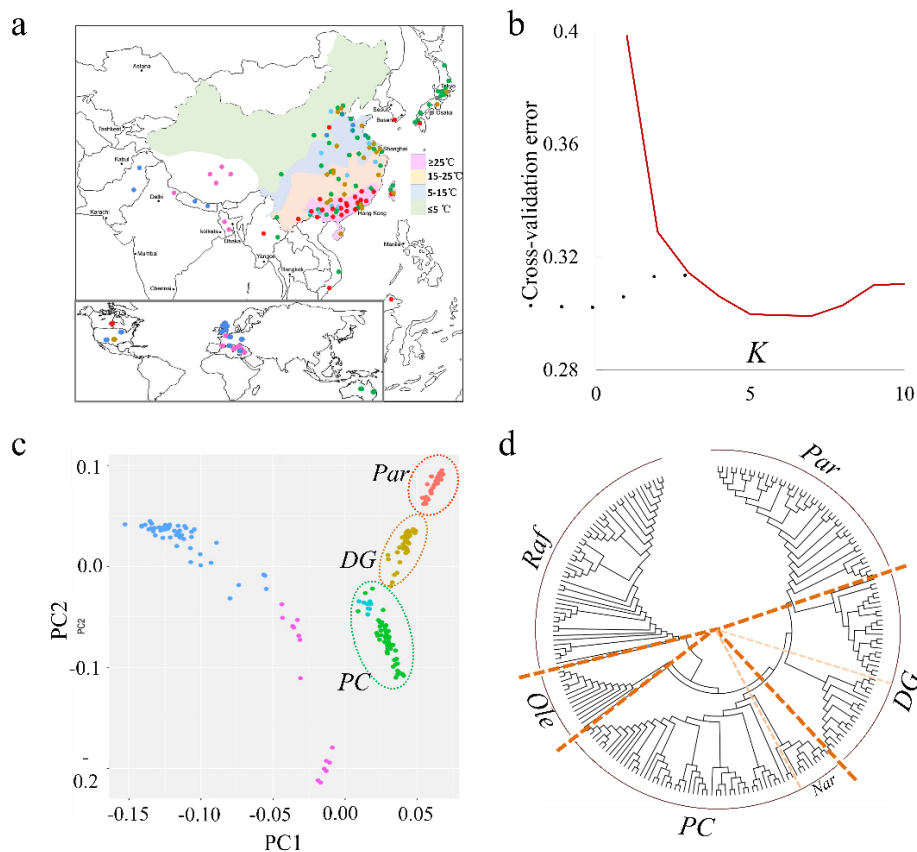

(a) Geographical origins of the 210 lines of different *Brassica rapa* morphotypes. Different colors show regions with different yearly average maximum temperatures. *Par* represents *B. rapa subsp. chinensis var. parachinensis* (marked with red dots), *DG* represents *B. rapa subsp. chinensis var. Dark-Green* (brown dots), *PC* represents *B. rapa subsp. chinensis* (pak choi) (green dots), *Nar* represents *B. rapa subsp. chinensis var. narinosa* (light green dots), *Ole* represents *B. rapa subsp. Oleifera* (rosy dots), and *Raf* represents *B. rapa subsp. rapifera* (blue dots).

(b) Cross-validation at different K levels, with K ranging from 1 to 10. K-fold Cross Validation in the R program was used to estimate the best K value. K = 7 clusters maximized the marginal likelihood and decreasing the number of clusters by one or two, respectively, did not substantially change the observed clustering pattern. For K = 5, *Ole* was clearly separated from *Raf*; For K = 6, *Nar* was divided from *PC*; For K = 7, *DG* was further divided into two clusters, *subsp. chinensis HY* and *subsp. chinensis NB* (Figure 1c; Supplementary Figure 1b). K = 5 explained the population structure best and maximized the marginal likelihood. We selected K=5 for the following analysis. Most of the morphologically distinct crops long recognized as subspecies were largely resolved as distinct clusters in our *STRUCTURE* analyses, which was consistent with the empirical classification.

(c) Principal component analysis (PCA) of diversity in the *B. rapa* collection using the first two principal components. *Par* represents *B. rapa subsp. chinensis var. parachinensis* (marked with red dots), *DG* represents *B. rapa subsp. chinensis var. Dark-Green* (brown dots), *PC* represents *B. rapa subsp. chinensis* (pak choi) (green dots).

(d) A maximum likelihood (ML) tree of all the 210 *B. rapa* accessions inferred from single nucleotide polymorphisms (SNPs) at four-fold-degenerate sites. The phylogenetic tree was constructed using IQ-TREE.

**Supplementary Figure 2. The gene flow (migration rate) pattern and population divergence (pairwise  $F_{ST}$ ) values were evaluated among *PC*, *DG*, and *Par*.**

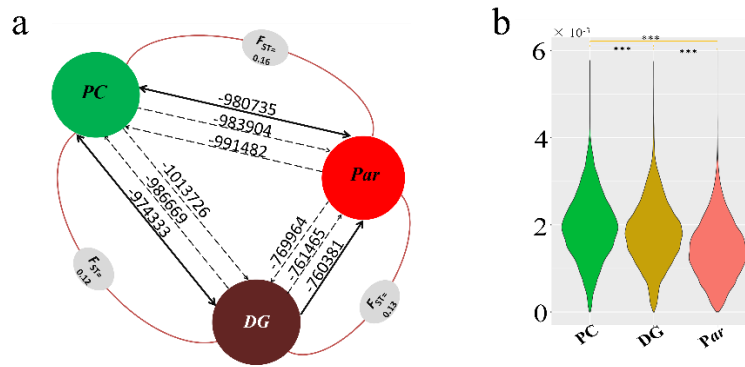

(a) The gene flow (migration rate) pattern and population divergence (pairwise  $F_{ST}$ ) values were evaluated among *PC*, *DG*, and *Par*. Hypothetical evolutionary relationships among *PC*, *DG*, and *Par* are indicated by gene flow. All of the probable evolutionary patterns (dashed arrows) among the *PC*, *DG*, and *Par* groups are summarized, and the proven evolutionary patterns are shown as solid dark lines. The numbers on the lines of arrows represent the marginal likelihoods of each probable evolutionary pattern among the *PC*, *DG*, and *Par* groups. High values of marginal likelihood suggest a high possibility of the corresponding pattern, and arrows point in the direction of the inferred gene flow. For  $F_{ST}$  analysis, The largest population divergence was found between the *Par*/*PC* comparison ( $F_{ST} = 0.160$ ), following by the *Par*/*DG* (0.131) and *DG*/*PC* (0.118) comparisons, respectively.

(b) Nucleotide diversity ( $\pi$ ) within each group. the  $\pi$  values progressively reduced from *PC* ( $2.04 \times 10^{-3}$ ) to *DG* ( $1.89 \times 10^{-3}$ ), and then to *Par* ( $1.79 \times 10^{-3}$ ).

Supplementary Figure 3. Images of of *PC*, *DG* and *Par*.

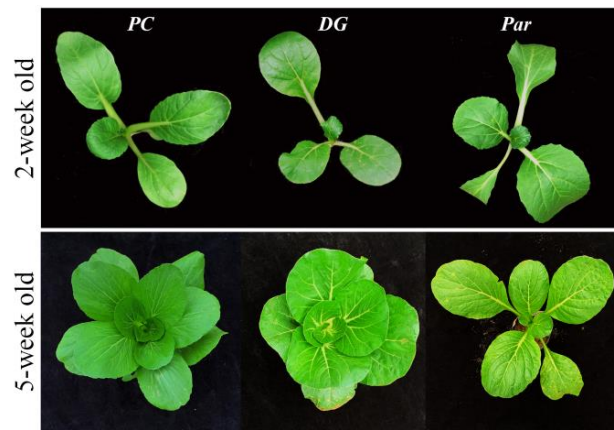

The three subspecies resemble each other at the seedling stage (the upper panel); while at adult juvenile stage, *PC* and *DG* share similar plant architecture, and *DG* and *Par* have similar the leaf shapes and color (the lower panel). Photographs of plants grown under natural field conditions in Beijing for 2- and 5-week were shown. *Par* represents *B. rapa* subsp. *chinensis* var. *parachinensis*, *DG* represents *B. rapa* subsp. *chinensis* var. *Dark-Green*, *PC* represents *B. rapa* subsp. *chinensis* (pak choi).

**Supplementary Figure 4. *Par* showed higher thermotolerance comparing with that of *PC* and *DG*.**

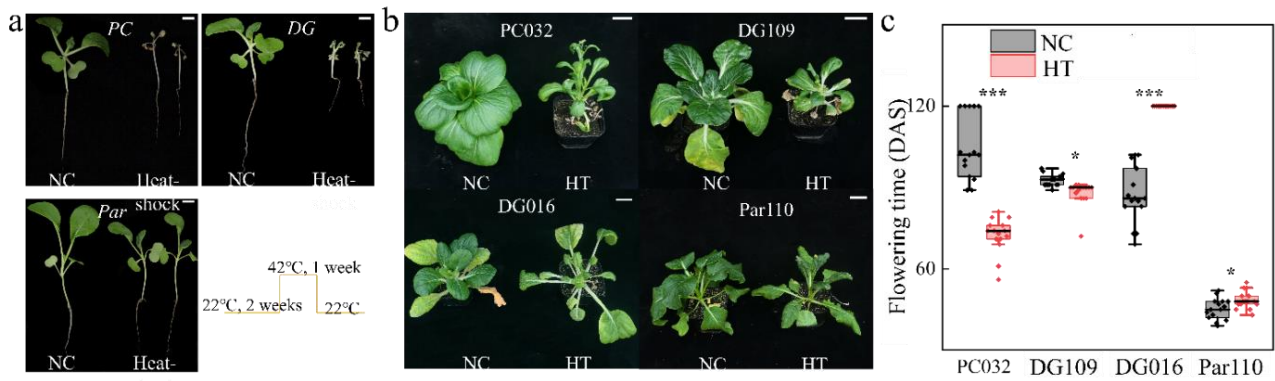

**(a)** For heat shock treatment, 14-day seedlings grown under normal conditions (NC) were moved to NC and heat-shock conditions (16/8 h day/night, 42°C/42°C), respectively, for another one week. After the high temperature treatment, the plants were recovered at 22°C for 5 days. At the end of recovery, photographs were taken. Scale bar = 2 cm. **(b)** For high temperature treatment, *PC*032, a *BrJMJ18<sup>PC</sup>*-carrying *PC* line, *DG*109, a *BrJMJ18<sup>PC</sup>*-carrying *DG* line, *DG*016, a *BrJMJ18<sup>Par</sup>*-carrying *DG* line, and *Par*110, a *BrJMJ18<sup>Par</sup>*-carrying *Par* line were randomly selected from our germplasm collection. 4-week-old seedlings grown under NC were moved to NC and high temperature (16/8 h day/night, 29°C/29°C, HT) conditions, respectively until flowering. *DG*106 under HT condition did not flower within the observe window of 120 days. Scale bar = 5 cm. **(c)** Flowering time of plants shown in (b). Flowering time of *DG*106 under HT condition was set to 120 days. Data are means  $\pm$  SD,  $n = 15$ . The box encompasses two middle quartiles, with central line showing median. Whiskers extend to the furthest data point within 1.5 times the interquartile range. Asterisks indicate significant differences between NC and HT, two-tailed Student's t-test (\* $p < 0.05$ , \*\* $p < 0.01$ , \*\*\* $p < 0.001$ ). *PC*032,  $p = 1.58 \times 10^{-08}$ ; *DG*109,  $p = 0.0014$ ; *DG*016,  $p = 1.18 \times 10^{-09}$ ; *Par*110,  $p = 0.039$ . Source data are provided as a Source Data file.

Supplementary Figure 5. Geographical locations and temperature characteristics of cities Zhangjiakou (ZJK) and Beijing (BJ).

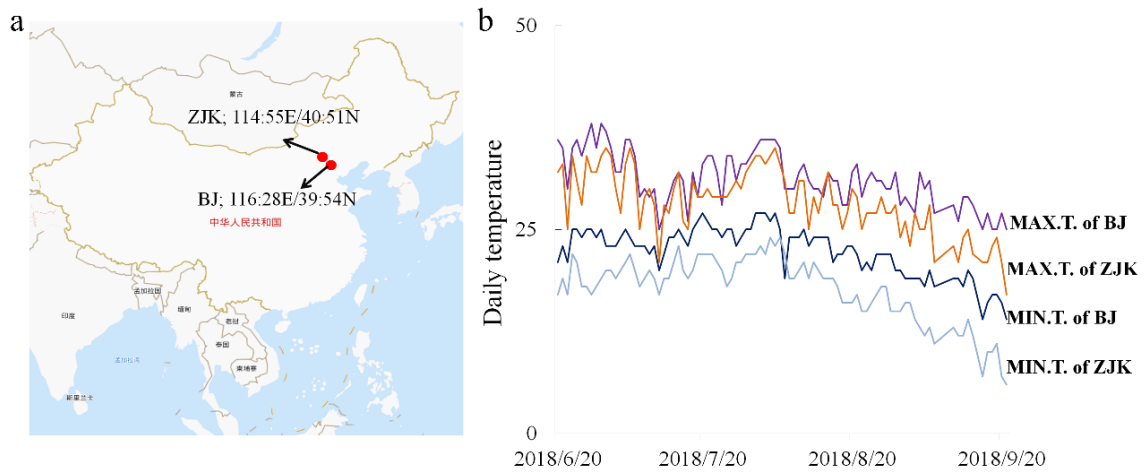

ZJK is 125 miles northwest of BJ (a); both cities have very similar climate characteristics, except for the temperature: The daily temperature of BJ is an average of approximately 5 °C higher than that of ZJK from the 20<sup>th</sup> of June to the 20<sup>th</sup> of September, annually (b). MAX.T., daily maximum temperatures; MIN.T., daily minimum temperatures.

**Supplementary Figure 6. Candidate genes that are specifically involved in the domestication of *Par*.**

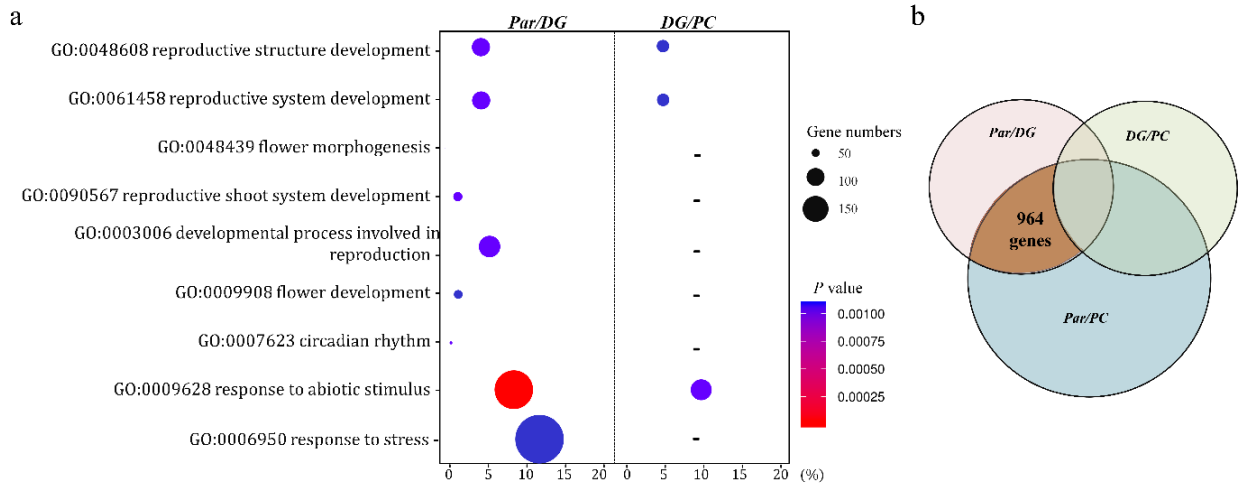

(a) GO terms associated with reproduction and abiotic stress were specifically enriched in the *Par/DG* comparison Diagram showing genes in the selective loci that differentiate between *Par/DG*, but not *DG/PC*. A total of 24 loci and 964 candidate genes were found (Supplementary Data 1, 2).

(b) Genes in the selective loci that differentiate between *Par/DG*, but not between *DG/PC*. A total of 24 loci and 964 candidate genes were found.

Supplementary Figure 7. Fourteen of the 21 *AtJMJ* genes respond to short-term heat stress.

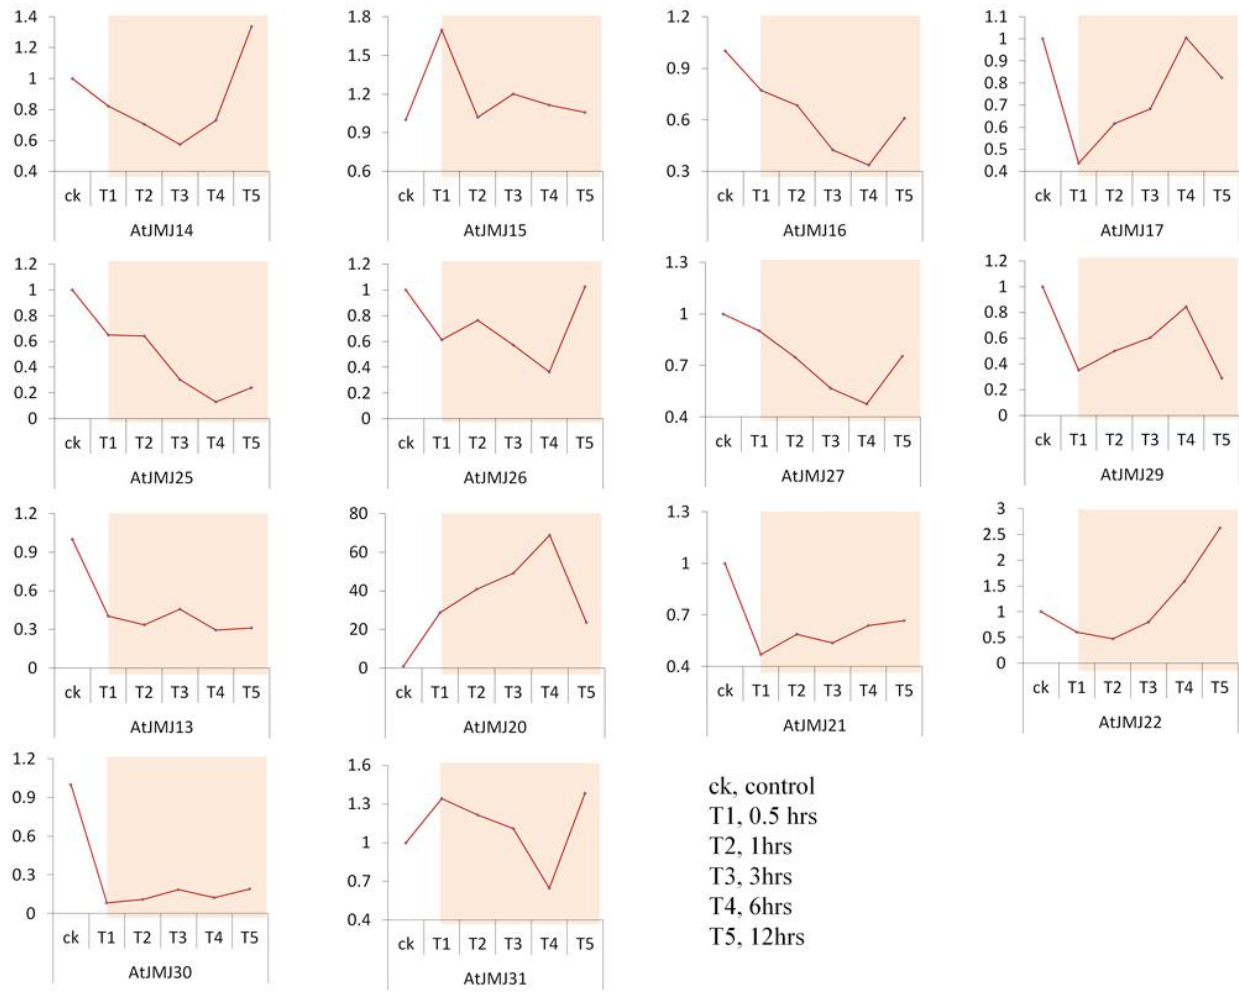

Plots were generated from online Arabidopsis microarray data at TAIR. Treatment: On day 16, heat stress treatment started after 3 h of the light period; samples were taken at 0.5, 1, 3, 6, 12 h after treatment.

Supplementary Figure 8 *BrMJ18* locates in a pairwise linkage disequilibrium (LD) block around *gQTL<sup>A09-1</sup>* of *Par/DG*.

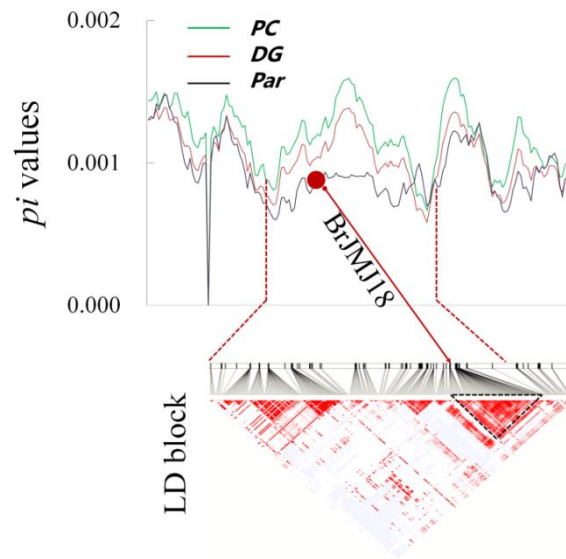

*BrMJ18* was found to be located in a linkage disequilibrium (LD) block of *Par/DG*. The local  $\pi$  value features for the selection sweep on chromosome A09 of *PC*, *DG*, and *Par* around *gQTLA09-1* were shown in the Y-axis. Red dot indicates the position of *BrMJ18*.



Supplementary Figure 9. Expression of *BrMJ18* under different temperatures.

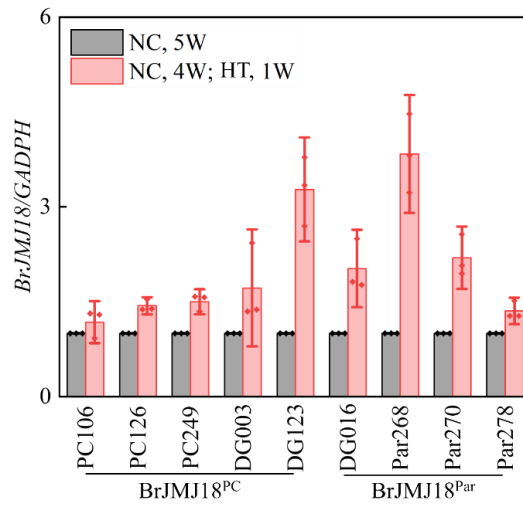

*BrMJ18* was induced by heat, but to a similar degree, in *DG* and *Par*. 3 *BrMJ18*<sup>PC</sup>-carrying *PC* (PC016, PC126, PC249) accessions, 2 *BrMJ18*<sup>PC</sup>-carrying *DG* (DG003, DG123) accessions, 1 *BrMJ18*<sup>Par</sup>-carrying *DG* (DG016) accessions and 3 *BrMJ18*<sup>Par</sup>-carrying *Par* (Par268, Par270, Par278) accessions were randomly selected from our germplasm collection. 5-week-old plants grown under normal conditions (NC), and 4-week-old plants grown under NC following high temperature (HT) for one week were used for *BrMJ18* Q-PCR. *GADPH* was used as internal control. The values are the mean  $\pm$  standard deviation from three biological replicates. Source data are provided as a Source Data file.

Supplementary Figure 10. Frequency distribution of *BrMJ18<sup>PC</sup>* and *BrMJ18<sup>Par</sup>* in the ancient *subsp. rapifera* and *subsp. oleifera* groups, respectively.

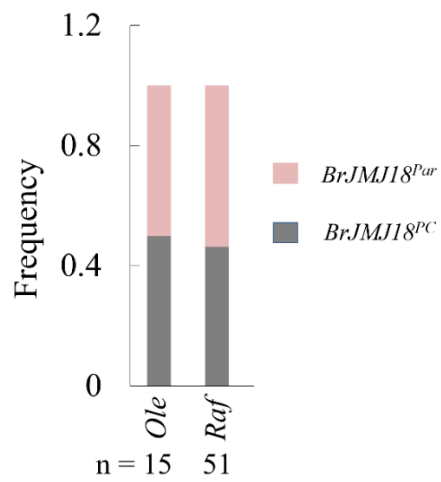

To further identify other natural variants of *BrMJ18*, we extend the haplotype analysis to all 210 accessions used in this study. No other haplotypes beyond of *BrMJ18<sup>PC</sup>* and *BrMJ18<sup>Par</sup>* were found. However, it was noteworthy that *BrMJ18<sup>PC</sup>* and *BrMJ18<sup>Par</sup>* were evenly represented in the ancient *subsp. rapifera* and *subsp. oleifera* groups, respectively.

Supplementary Figure 11. Long-term high temperature exerted a stronger effect on *BrMJ18<sup>PC</sup>*- than on *BrMJ18<sup>Par</sup>*-carrying lines.

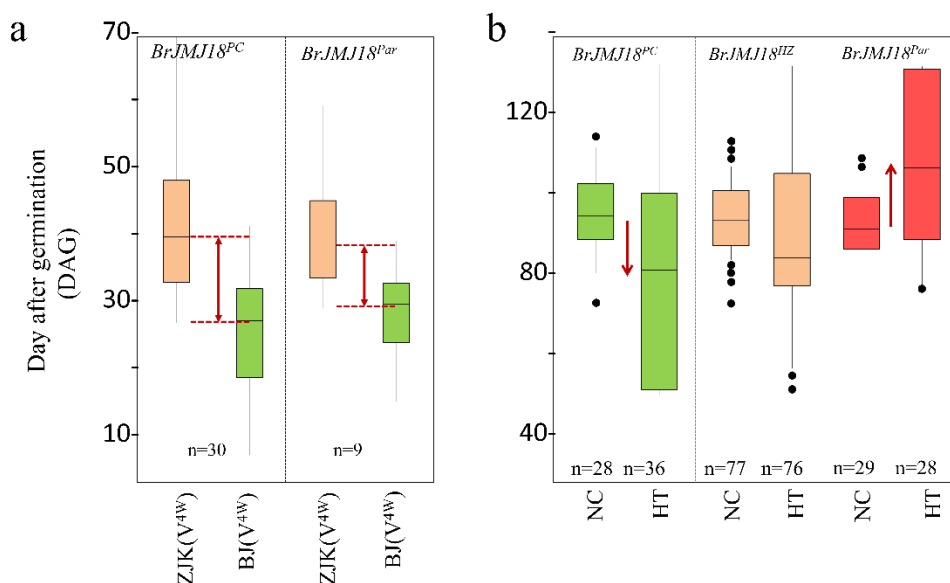

(a) The flowering times of *BrMJ18<sup>PC</sup>*- and *BrMJ18<sup>Par</sup>*-carrying *DG* lines ( $n = 39$ ) farmed under natural field conditions in Zhangjiakou (ZJK) and Beijing (BJ), respectively, were used for analysis. The daily temperature of BJ is an average of 5 °C higher than that of ZJK. The earlier flowering induced by high temperature was attenuated significantly in *BrMJ18<sup>Par</sup>*-carrying plants. Flowering time, days after germination (DAS), was defined as the number of days from sowing to the appearance of the visible buds.

(b) Flowering time of *BrMJ18<sup>PC</sup>*-, *BrMJ18<sup>Par</sup>*- and *BrMJ18<sup>PC/Par</sup>*-carrying lines of the F2 population, which was generated from the F1 crosses of *PC* and *Par*. The flowering time was evaluated under normal conditions (NC) and high temperature (HT) conditions, respectively. NC seedlings were grown at 22°C under a long-day regime (16/8 h day/night) for 4 weeks, and then transplanted in pots under NC until bolting. HT, 4-week seedlings grown under NC were transplanted and moved to HT conditions until bolting. Flowering time, days after sowing (DAS), was defined as the number of days from sowing to the appearance of the visible bud. HT conditions caused early flowering in *BrMJ18<sup>PC</sup>*-carrying plants, but delayed flowering in *BrMJ18<sup>Par</sup>*-carrying plants (as shown by red arrows).

Data are means  $\pm$  SD. The box encompasses two middle quartiles, with central line showing median. Whiskers extend to the furthest data point within 1.5 times the interquartile range.

**Supplementary Figure 12. Flowering characterizations of the Arabidopsis *BrMJ18* transgenic plants under different temperatures.**

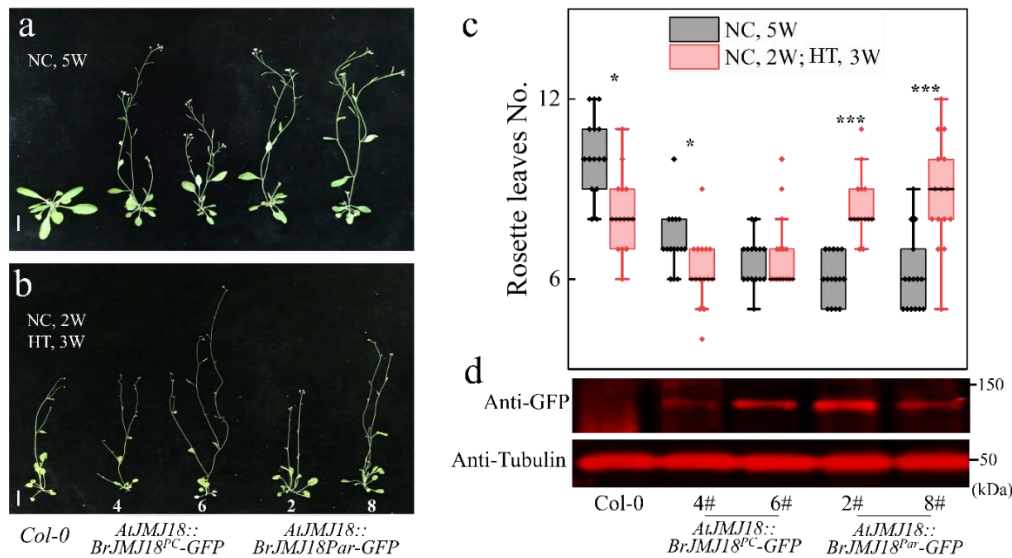

(a) Phenotypes of the *BrMJ18* transgenic plants grown under normal conditions (NC) for 5 weeks. Both *BrMJ18<sup>PC</sup>* and *BrMJ18<sup>Par</sup>* greatly promoted flowering under NC. The open reading frames (ORFs) of *BrMJ18<sup>PC</sup>* and *BrMJ18<sup>Par</sup>* driven by the promoter (2 kb) of *AtJMJ18*, respectively, were transformed into *Arabidopsis Col-0* plants. Transgenic T2 lines with similar protein expressions were used for study. Scale bar, 2 cm.

(b) Phenotypes of the *BrMJ18* transgenic plants grown under NC conditions for 2 weeks, following another 3-weeks of high temperature (HT) conditions. The increase in temperature accelerated flowering in *Col-0* and *AtJMJ18::BrMJ18<sup>PC</sup>-GFP* plants, but not in the *AtJMJ18::BrMJ18<sup>Par</sup>-GFP* plants. Scale bar, 2 cm.

(c) Total primary rosette leaves before bolting of the plants shown in (a) and (b). Data are means  $\pm$  SD,  $n = 15$ . The box encompasses two middle quartiles, with central line showing median. Whiskers extend to the furthest data point within 1.5 times the interquartile range. Asterisks indicate significant differences between NC and HT, two-tailed Student's *t* test ( $*p < 0.05$ ,  $**p < 0.01$ ,  $***p < 0.001$ ). *Col-0*,  $p = 0.0011$ ; 4#,  $p = 0.026$ ; 2#,  $p = 9.59 \times 10^{-6}$ ; 8#,  $p = 9.47 \times 10^{-5}$ . Source data are provided as a Source Data file. (d) Confirmation of *BrMJ18* protein expression in the transgenic plants under NC conditions by immunoblotting analysis. The anti-GFP antibody recognized a specific endogenous protein of approximately 150 kDa in transgenic, but not in *Col-0* plants. Tubulin, detected by blotting with anti-tubulin antibodies, served as a loading control.

**Supplementary Figure 13. Protein sequence alignment of BrJMJ18 and AtJMJs.**

Phylogenetic analysis of BrJMJ18 and AtJMJ proteins. BrJMJ18 shows the highest similarity (87%) at the amino acid level to AtJMJ18 among all the 21 AtJMJs of *Arabidopsis*. The phylogenetic tree was generated using the DNAMAN software. Estimated similarities are indicated at each branch.

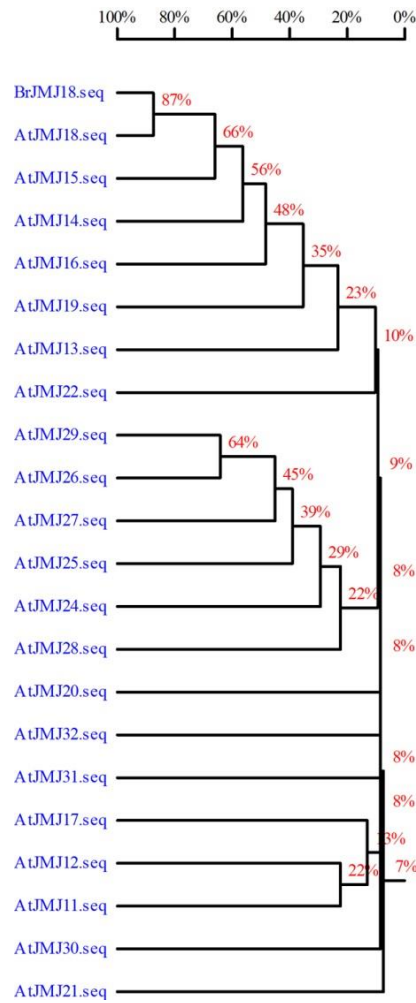

Supplementary Figure 14 BrJMJ18 can't demethylase H3K4me3/2, H3K9me3/2 and H3K27me3/2.

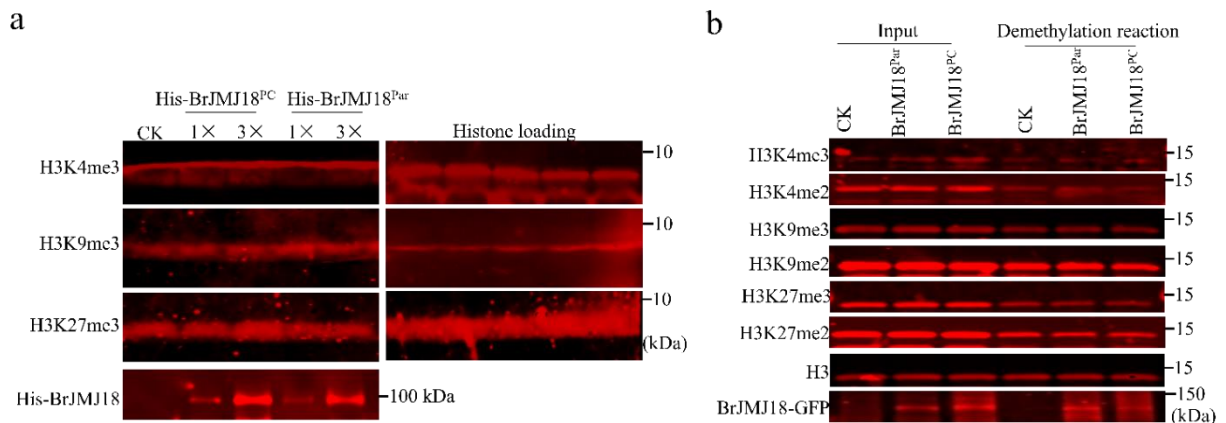

Both BrJMJ18<sup>PC</sup>-GFP and BrJMJ18<sup>Par</sup>-GFP demethylate H3K36me3 and H3K36me2, but not H3K4me3 and H3K4me2, H3K9me3 and H3K9me2, and H3K27me3 and H3K27me2, *in vitro*. (a) The two allelic His-BrJMJ18 proteins were affinity-purified from *Escherichia coli* cells. Purified His was used as a negative control. And synthesized Histone H3 peptides with H3K4me3, H3K9me3 and H3K27me3 modification were used as substrates, respectively. (b) The two allelic BrJMJ18-GFP proteins were immunoaffinity-purified from *Arabidopsis BrJMJ18* transgenic lines (*AtJMJ18::BrJMJ18<sup>orf</sup>-GFP*) and subjected to *in vitro* demethylase analysis using histone from calf thymus as a substrate. *Col-0* was used as a negative control. The *in vitro* demethylation mixture was separated by SDS-PAGE and immunoblotted using the antibodies specified on the left. Immunoaffinity-purified BrJMJ18-GFP proteins were detected with anti-GFP antibodies to confirm equal loading of BrJMJ18<sup>PC</sup>-GFP and BrJMJ18<sup>Par</sup>-GFP. H3, detected by blotting with anti-H3 antibodies, served as a loading control. The experiments were repeated three times with similar results.

Supplementary Figure 15. BrJMJ18 antibody specifically recognized BrJMJ18 protein in *Par.*

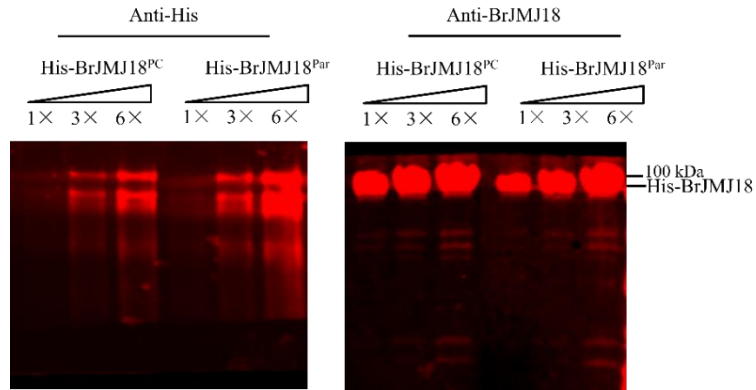

Recombinant His-BrJMJ18<sup>PC/Par</sup> proteins were affinity-purified from *Escherichia coli* cells. About 0.8-4.8  $\mu\text{g}$  His-BrJMJ18 proteins were separated by SDS-PAGE. Immunoblotting analyses were conducted using anti-His (HT501, TransGen, China) and anti-BrJMJ18 antibodies, respectively. The His antibody identified the His-BrJMJ18 band at about 100 KD and several non-specific bands. BrJMJ18 antibody identified exactly the same His-BrJMJ18 bands with His antibody. The experiments were repeated three times with similar results.

**Supplementary Figure 16. The enrichments of BrJMJ18<sup>PC</sup> and BrJMJ18<sup>Par</sup> at *BrFLC1*, 2 and 5 under different temperatures.**

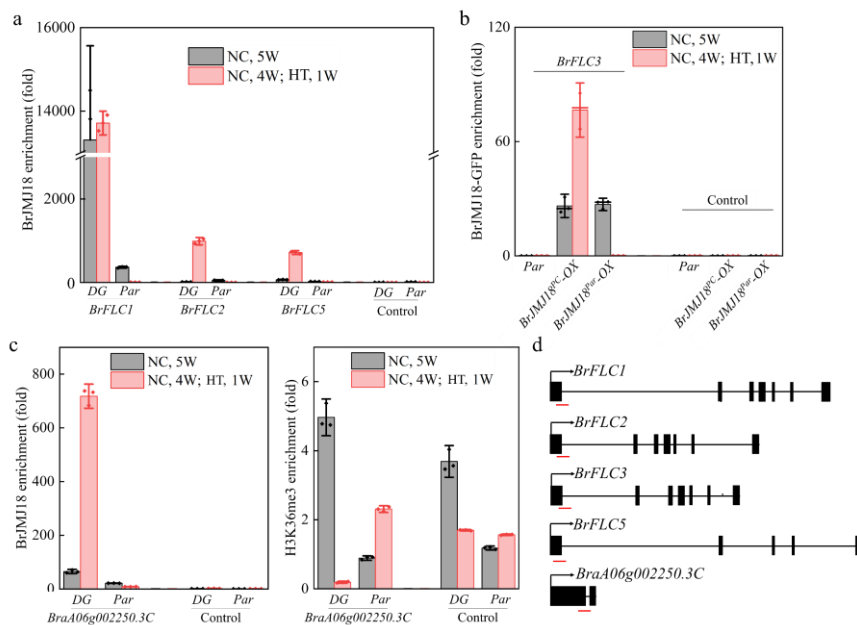

(a) Chromatin immunoprecipitation (ChIP) analysis of the BrJMJ18 and H3K36me3 level across *BrFLCs* were performed in *BrJMJ18<sup>Par</sup>*-carrying *Par* and *BrJMJ18<sup>PC</sup>*-carrying *DG* plants. Five-week-old plants grown under normal conditions (NC) and four-week old plants grown under NC following 1-week of high temperature (HT) were used for the analysis. Together with Figure 5A, we showed that in *DG*, BrJMJ18<sup>PC</sup> binds strongly to *BrFLC1-3*, and high temperature aggravates their binding markedly. While in *Par*, BrJMJ18<sup>Par</sup> binds strongly to *BrFLC3*, and slightly to *BrFLC1*; and intriguingly, we noticed that high temperature thoroughly disassociated the binding of BrJMJ18<sup>Par</sup> to *BrFLC3* (Figure 6A). (b) To further test the binding of BrJMJ18 to *BrFLC3*, anti-GFP ChIP-qPCR was conducted using *Par* and *BrJMJ18<sup>PC/Par</sup>-OX* plants grown under NC for 5 weeks or 4 weeks followed by 1 week HT treatment. Under NC, both BrJMJ18<sup>PC</sup>-GFP and BrJMJ18<sup>Par</sup>-GFP proteins bind to *BrFLC3*. Binding of BrJMJ18<sup>PC</sup>-GFP to *BrFLC3* was aggravated by HT, while BrJMJ18<sup>Par</sup>-GFP protein thoroughly disassociated from *BrFLC3*. (c) To investigate the binding of BrJMJ18 to targets other than *BrFLCs*, we conducted ChIP-qPCR using anti-BrJMJ18 antibody (left panel) and anti-H3K36me3 antibody (right panel) on the randomly selected BrJMJ18-binding gene *BraA06g002250.3C* from Supplementary Data 7. Both allele of BrJMJ18 protein could bind to *BraA06g002250.3C* under NC. High temperature aggravates BrJMJ18<sup>PC</sup>'s binding to *BraA06g002250.3C* while disassociated the binding of BrJMJ18<sup>Par</sup>, sharing the same changing pattern of binding to *BrFLC3*. Compared to NC, H3K36me3 levels of *BraA06g002250.3C* loci decreased in *DG* while increased in *Par* under HT. The fold enrichment of BrJMJ18 and H3K36me3 level was calculated using IgG as control. *GADPH* was used as a BrJMJ18-independent control. Control is a locus gene desert regions where BrJMJ18 does not bind. The values are the mean  $\pm$  standard deviation from three biological replicates. (d) Cartoons showing the analyzed region of *BrFLCs* and *BraA06g002250.3C* by ChIP-qPCR. Black boxes represent the exons and black bars between them represent introns. Analyzed regions are represented by the red bars. Source data of (a) to (c) are provided as a Source Data file.



Supplementary Figure 17. *BrFLC3* is one of the two expressed *BrFLCs* and the only downregulated *BrFLC* during floral transition in *Par*.

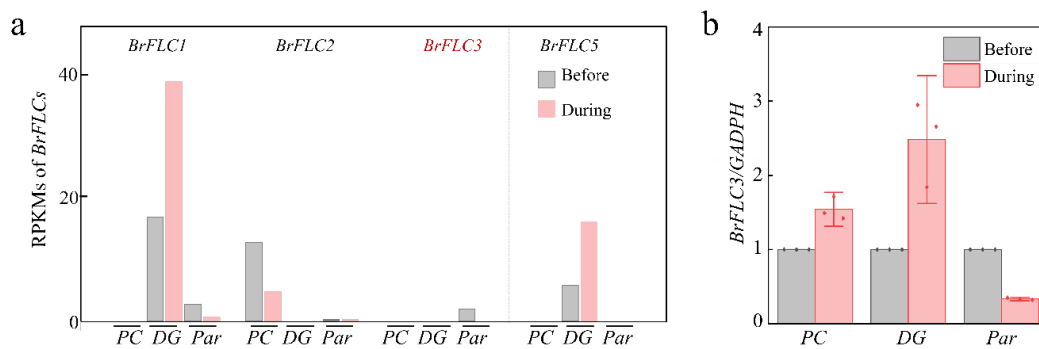

(a) The expression data derived from RNA sequencing data of *PC*, *DG* and *Par* plants grown under natural field conditions before and during bolting. (b) *BrFLC3* expression in *PC*, *DG* and *Par* grown under natural field conditions before and during bolting detected by Q-PCR. *GADPH* was used as internal control. Source data are provided as a Source Data file.

**Supplementary Figure 18. Expression of *AtFLC* and *AtFT* in *AtJMJ18::BrJMJ18<sup>PC</sup>-GFP* and *AtJMJ18::BrJMJ18<sup>Par</sup>-GFP* plants under different temperatures.**

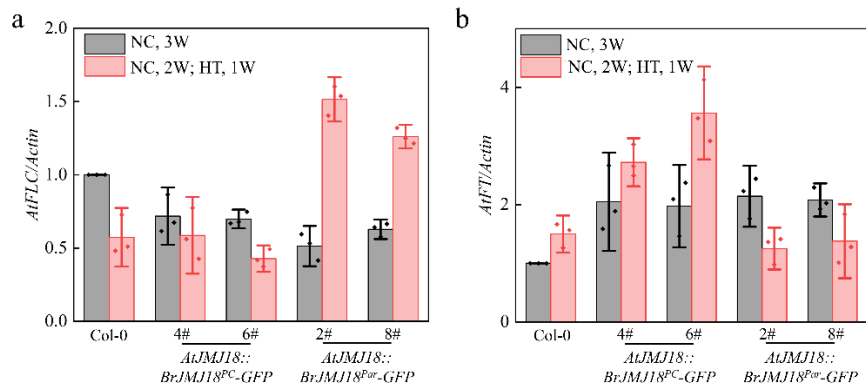

(a) *AtFLC* expression decreased in *AtJMJ18::BrJMJ18<sup>PC</sup>-GFP* but increased in *AtJMJ18::BrJMJ18<sup>Par</sup>-GFP* plants upon high temperature treatment. (b) The induction degree of the *AtFT*'s expression by high temperature was in strongly weakened in *AtJMJ18::BrJMJ18<sup>Par</sup>-GFP* transgenic plants, which is consistent with their flowering time variations.

Three-week old plants grown under normal conditions (NC), and two-week old plants grown under NC following 1-week of high temperature (HT) were used for the analysis. Actin was used as internal control. The values are the mean  $\pm$  standard deviation from three biological replicates.

Source data are provided as a Source Data file.

**Supplementary Figure 19. Chromatin immunoprecipitation (ChIP) analysis of H3K36me3 enrichment on the *AtFLC* locus in *BrJMJ18* overexpression *Arabidopsis* lines under normal conditions (NC) and high temperature (HT) conditions, respectively.**

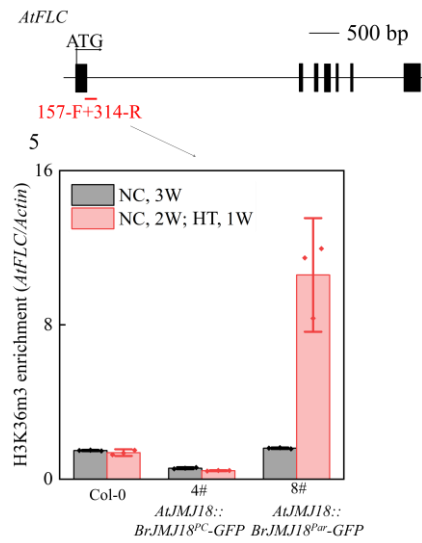

The H3K36me3 level at *AtFLC* was downregulated in *AtJMJ18::BrJMJ18<sup>PC</sup>-GFP* but upregulated in *AtJMJ18::BrJMJ18<sup>Par</sup>-GFP* plants by heat. Three-week old plants grown under NC, and two-week old plants grown under NC following 1-week of HT were used for the analysis. *Actin2* was used as internal control of H3K36me3 as reported by Yang, et al, 2017 previously <sup>1</sup>. The values are the mean  $\pm$  standard deviation from three biological replicates. Source data are provided as a Source Data file.

Supplementary Figure 20. High temperature exerts different impact of the growth of *Par*, *BrMJ18-OX*, and *BrMJ18<sup>Par</sup>-CR* plants.

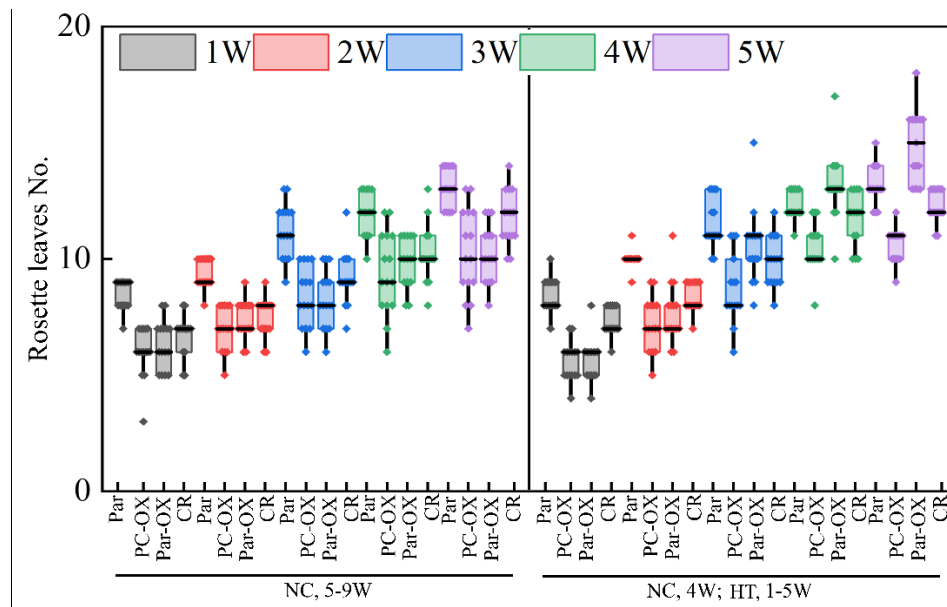

4-week-old *Par*, *BrMJ18-OX*, and *BrMJ18<sup>Par</sup>-CR* plants grown under NC condition were moved to NC and HT treatments. True leaves numbers were recorded weekly until flowering. Under NC conditions, the two allelic of *BrMJ18-OX* plants had fewer true leaves than *Par* plants, while *BrMJ18<sup>Par</sup>-CR* plants had a leaf count similar to *Par* plants. Under HT treatment, only *BrMJ18<sup>Par</sup>-OX* plants showed a noteworthy increase in true leaf number, whereas the leaf counts for the other three plant types exhibited no significant difference compared to NC condition. Data are means  $\pm$  SD. The box encompasses two middle quartiles, with central line showing median. Whiskers extend to the furthest data point within 1.5 times the interquartile range.  $n = 15$ . *Par* represents wild type *Par* plants, *PC-OX* represents *BrMJ18<sup>PC</sup>-OX* plants, *Par-OX* represents *BrMJ18<sup>Par</sup>-OX* plants, *CR* represents *BrMJ18<sup>Par</sup>-CR* plants. Source data are provided as a Source Data file.

**Supplementary Figure 21. GO analysis of enriched genes identified by BrMJ18 in *BrMJ18<sup>PC</sup>-OX* and *BrMJ18<sup>Par</sup>-OX* plants grown under NC and HT, respectively.**

Similar enriched entries between *BrMJ18<sup>PC</sup>-OX* and *BrMJ18<sup>Par</sup>-OX* plants under NC (a and b) and HT (c and d) were labeled with green and red arrows, respectively.

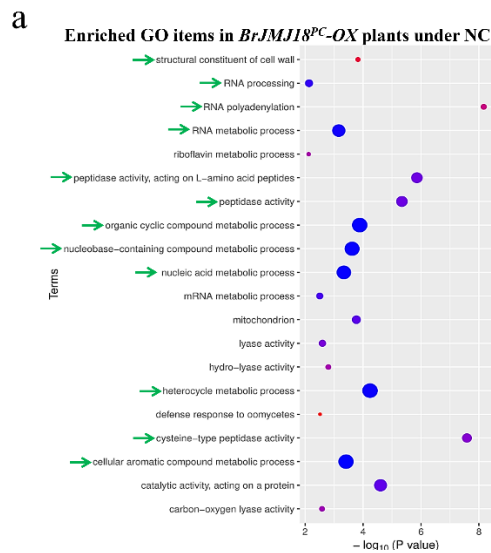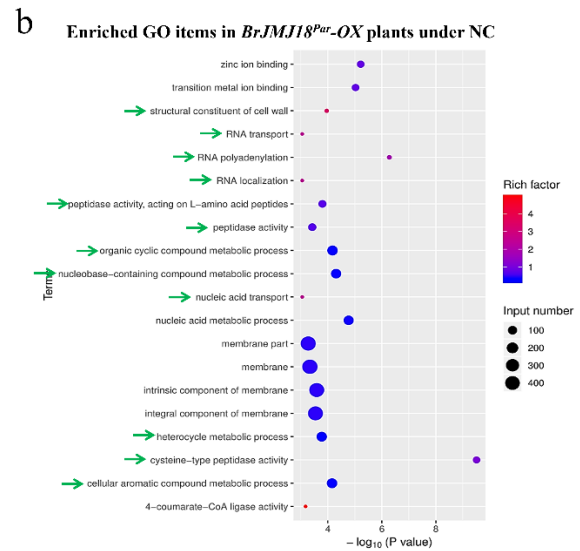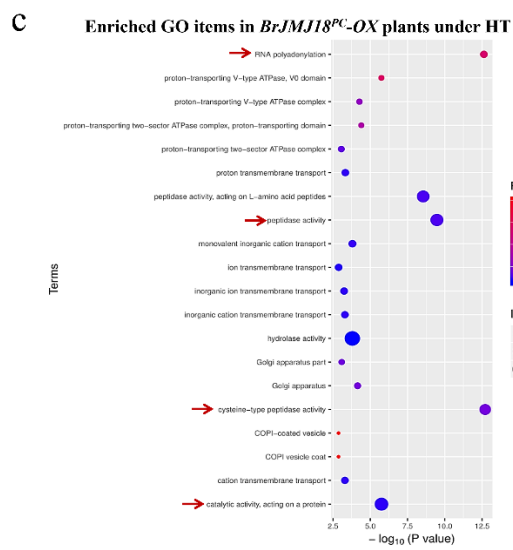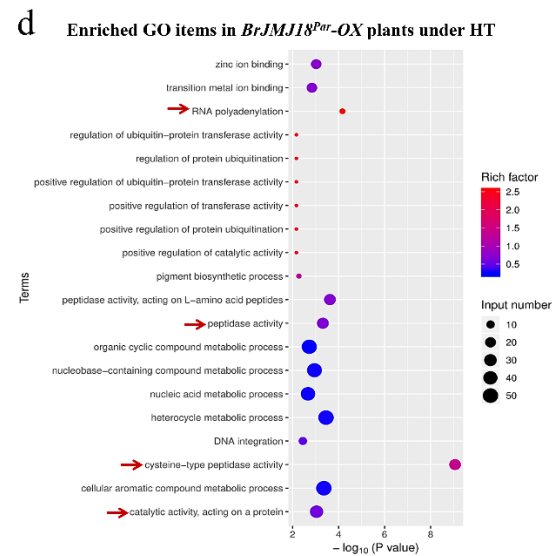

Supplementary Figure 22. GO analysis of DEGs of *BrMJ18<sup>PC</sup>-OX* and *BrMJ18<sup>Par</sup>-OX* plants under NC and HT, respectively.

In terms of GO categories, there were no big differences between *BrMJ18<sup>PC</sup>-OX* and *BrMJ18<sup>Par</sup>-OX* plants under NC (a), similar enriched entries were labeled with green arrows. While under HT, GO categories presented significant distinctions between the two plants (b).

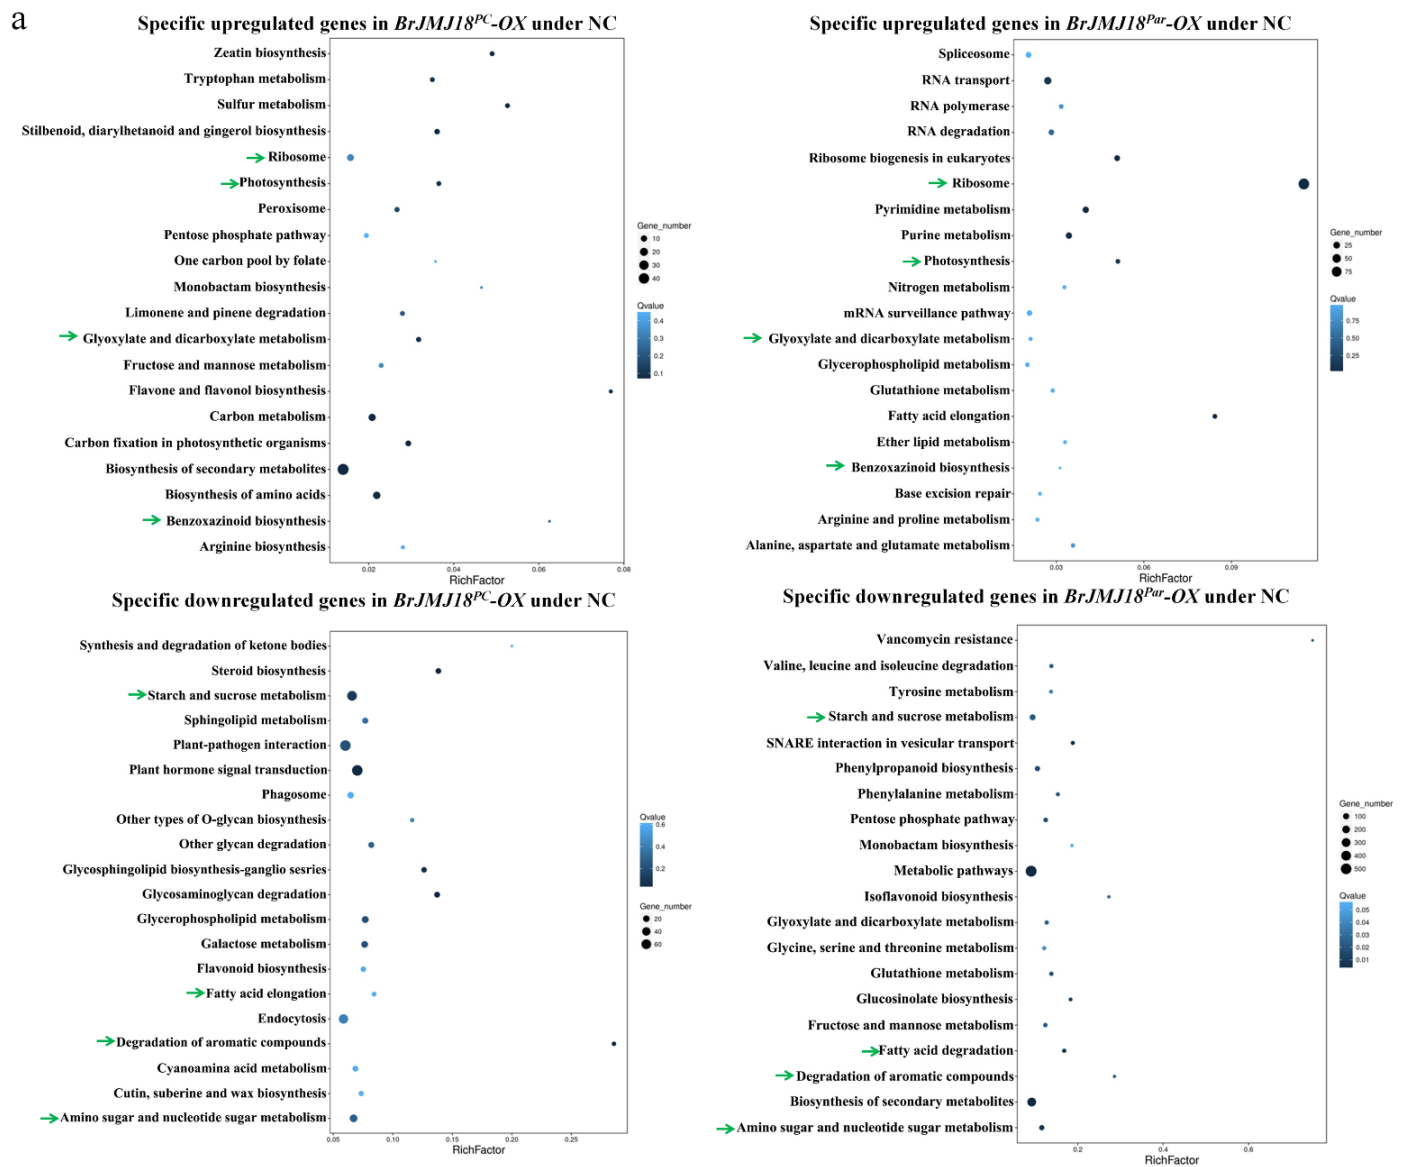

b

Specific upregulated genes in *BrMJ18<sup>PC</sup>-OX* under HT

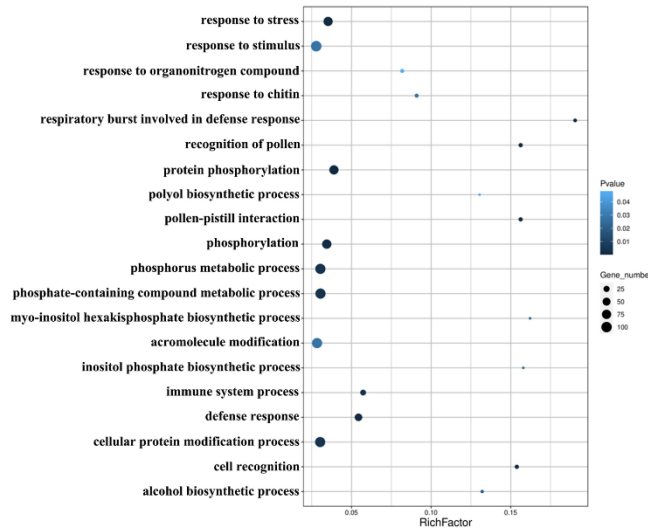

Specific upregulated genes in *BrMJ18<sup>Par</sup>-OX* under HT

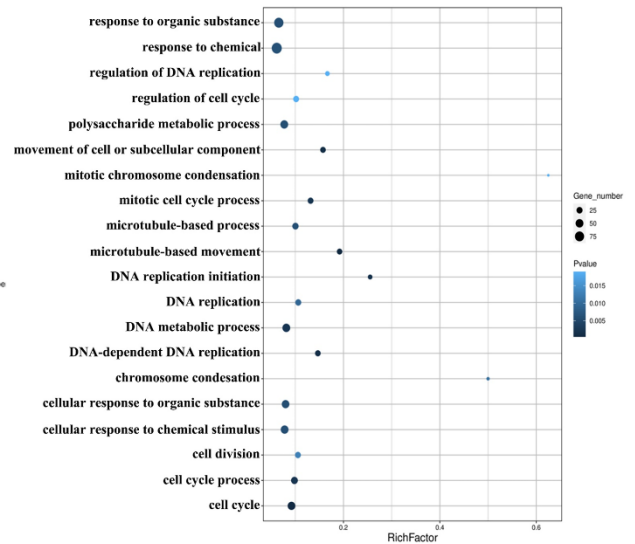

Specific downregulated genes in *BrMJ18<sup>PC</sup>-OX* under HT

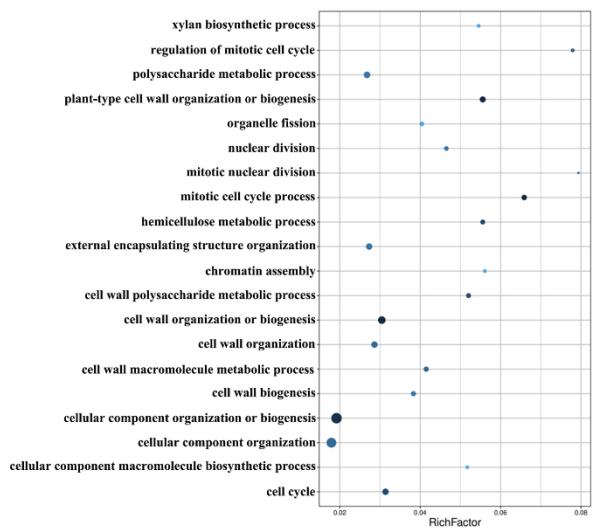

Specific downregulated genes in *BrMJ18<sup>Par</sup>-OX* under HT

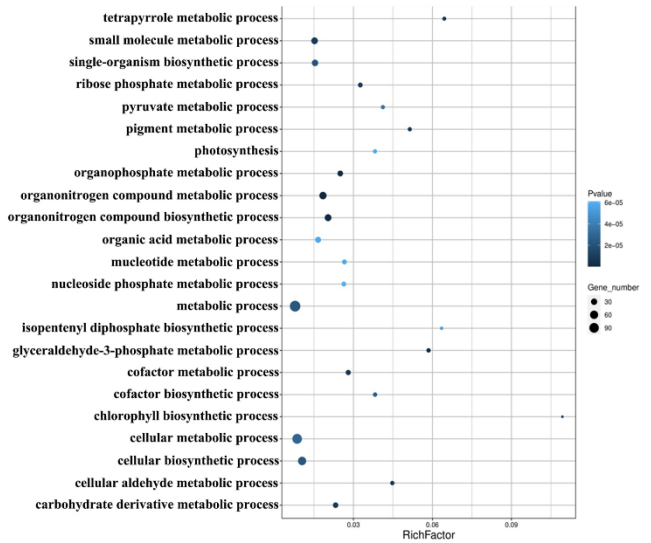

**Supplementary Figure 23. Flowering characterizations of transgenic *Arabidopsis* plants of *BrMJ18<sup>PC</sup>*, *BrMJ18<sup>Par</sup>*, and its variants under different temperatures.**

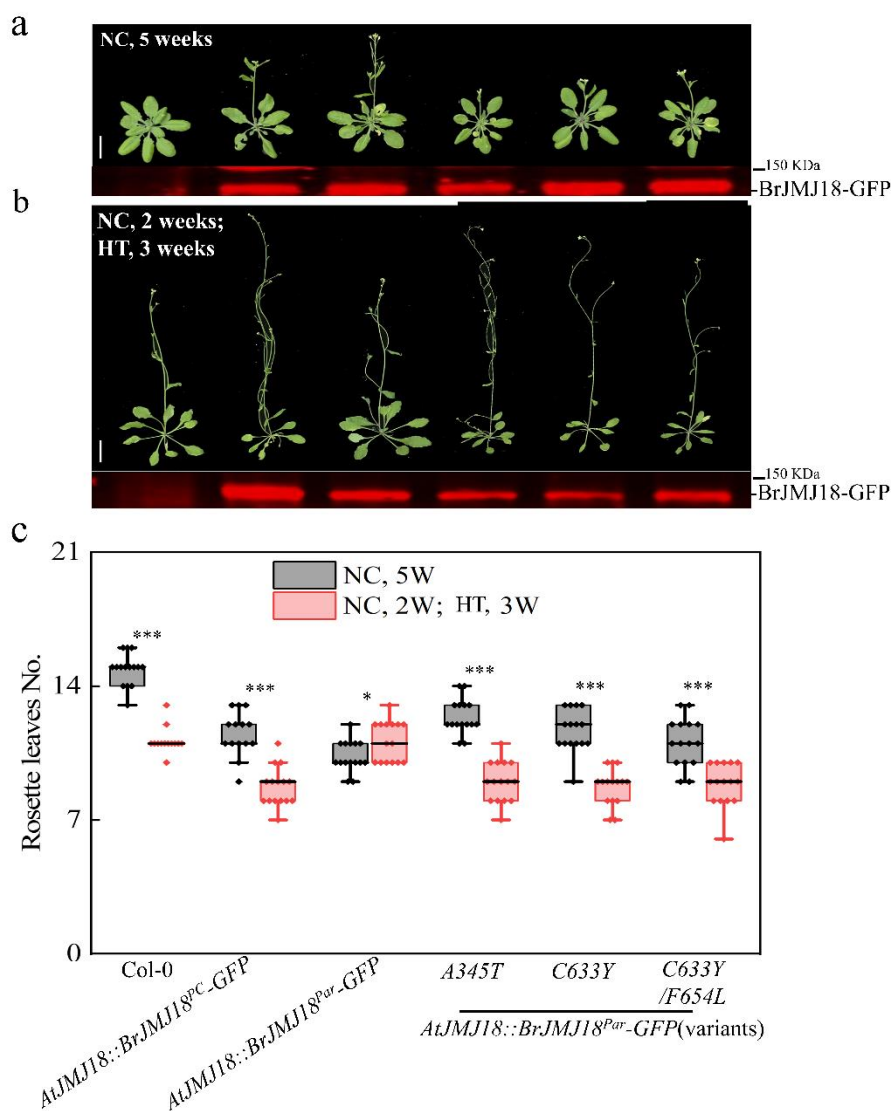

(a) Under NC, transgenic plants of *BrMJ18<sup>Par(A345T)</sup>*, *BrMJ18<sup>Par(C633Y)</sup>* and *BrMJ18<sup>Par(C633Y)/F654L</sup>* flowered at approximately the same time as *BrMJ18<sup>Par</sup>*- and *BrMJ18<sup>PC</sup>*-expressing plants; (b) under HT, high temperature significantly delayed flowering in the *BrMJ18<sup>Par</sup>* plants, but not in the *BrMJ18<sup>Par(A345T)</sup>*, *BrMJ18<sup>Par(C633Y)</sup>*, and *BrMJ18<sup>Par(C633Y)/F654L</sup>* plants. Besides, transgenic plants of *BrMJ18<sup>Par(A345T)</sup>*, *BrMJ18<sup>Par(C633Y)</sup>*, and *BrMJ18<sup>Par(C633Y)/F654L</sup>* exhibited very similar morphological characteristics to *BrMJ18<sup>PC</sup>*-expressing plants. BrMJ18-GFP proteins were detected with anti-GFP antibody to confirm equal expression of exogenous genes. Scale bar = 2 cm. (c) Phenotypes of the *BrMJ18s* transgenic *Arabidopsis* plants grown under NC conditions (5 weeks), and HT conditions (plants were grown under NC conditions for 2 weeks following another 3-weeks under high temperature), respectively, were used for flowering time evaluation. In (c), data are means  $\pm$  SD, n = 15. The box encompasses two middle quartiles, with central line showing median. Whiskers extend to the furthest data point within 1.5 times the interquartile range. Asterisks indicate significant differences between NC and HT, Student's t-test (\* $p < 0.05$ , \*\* $p < 0.01$ , \*\*\* $p < 0.001$ ). Col-0,  $p = 1.13 \times 10^{-8}$ ; PC-4#,  $p = 3.33 \times 10^{-5}$ ; Par-8#,  $p = 0.034$ ; A345T,  $p = 4.66 \times 10^{-7}$ ; C633Y,  $p = 3.32 \times 10^{-6}$ ; C633Y/F654L,  $p = 4.75 \times 10^{-5}$ . Source data are provided as a Source Data file.



**Supplementary Figure 24. A combined summary of estimated demographic modeling and written history of leafy *B. rapa* domestication events.**

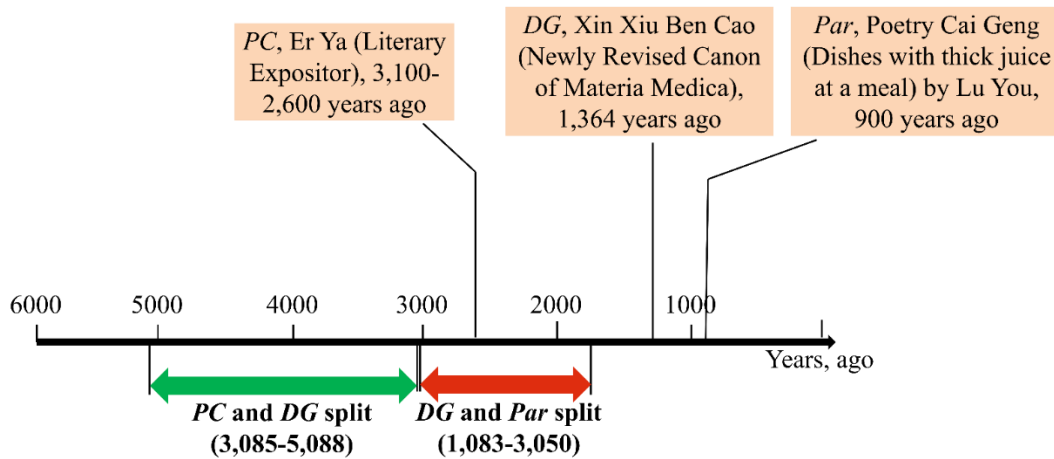

The black horizontal arrow represents time scale. The pink callouts above represent the historical written records of *PC*, *DG* and *Par* (Subspecies, source, time). The green and red bars below represent the estimated split time of *DG* and *Par* based on our *ada*i analysis. Turnips was described as “Feng” (葍) in the oldest Chinese poetry collection, Shi Jing (Classic of Poetry), about 3,100-2,600 years ago. And *PC* was called “Song” (菘) and was firstly described in the oldest Chinese encyclopedia, Er Ya (Literary Expositor), about 3,000-2,700 years ago in our country. Additionally, the word “Song” was used as a general term for leafy *B. rapa* crops, and different types of “Song” were recorded. For instance, three types of “Song” were recorded in Xin Xiu Ben Cao (Newly Revised Canon of Material Medica, 1364 years ago): “Niu Du Song (Big-Tummy Song)” with large and curved leaves, “Zi Song (Purple Song)” with purple and slightly bitter leaves (probably purple Pak Choi), and “Bai Song (White Song)” with white petioles and dark green leaves. According to the morphological features, the Bai Song is likely to be the *DG*. With regarding to *Par*, *Par* was recorded to be cultivated in the Taihu Lake area of China in the Song Dynasty (AD 960-AD 1,279) and was mentioned in a poetry Cai Geng by poet Lu You (AD 1,125 – AD 1,210). The recorded order of *PC*, *DG*, and *Par* corresponds to the appearance times inferred from genome sequencing. However, historical records of these times are indeed behind the predicted times from genome sequencing. We speculate that this could be due to the fact that species are generally not recorded immediately after their formation but before they are fully developed and widespread.

**Supplementary Figure 25. A working model of BrJMJ18<sup>PC</sup> and BrJMJ18<sup>Par</sup> under different temperature conditions.**

Under NC, the overexpression of BrJMJ18<sup>PC</sup> and BrJMJ18<sup>Par</sup> downregulates *BrFLC3* by demethylating its H3K36me3/2, consequently promoting flowering. Under high temperature conditions, the flowering promotion function of BrJMJ18<sup>PC</sup> is strengthened in *BrJMJ18<sup>PC</sup>-OX* plants. However, in *BrJMJ18<sup>Par</sup>-OX* plants *BrJMJ18<sup>Par</sup>* represses early flowering via a mechanism in which the binding and subsequent demethylation activity of BrJMJ18<sup>Par</sup> of *BrFLC3*, is notably weakened by heat. At the same time BrJMJ18<sup>Par</sup> promotes vegetative growth by regulating chlorophyll biosynthesis. The symbol “↓” represents the positive regulation to the downstream factors and “⊥” represents negative regulation to the downstream factors.

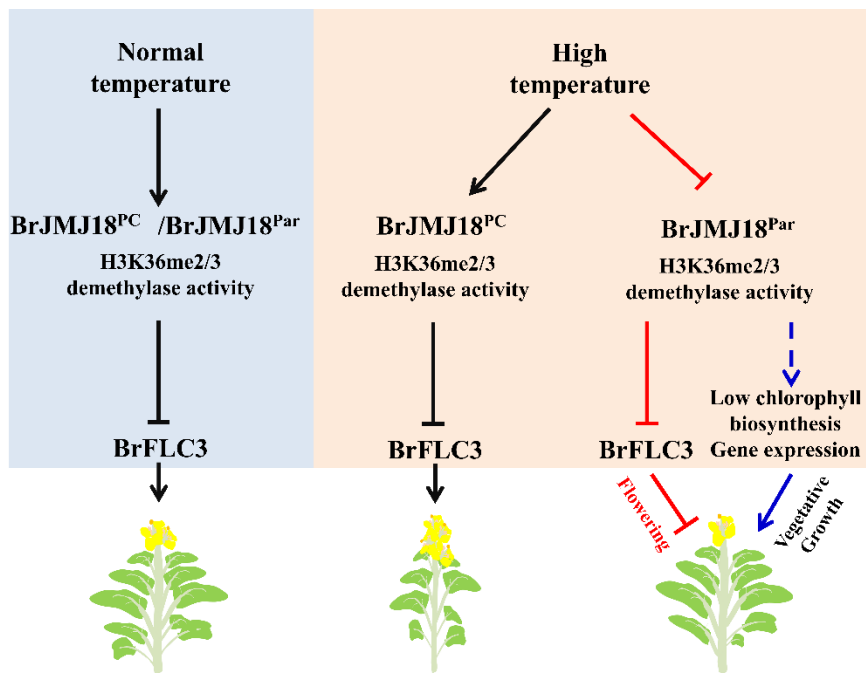

**Supplementary Figure 26. *BrFLC3* showed the lowest genomic similarity to *AtFLC* among all four *BrFLCs*.**

Genomic sequences of *AtFLC* and *BrFLC1-3, 5* were used for the analysis. The phylogenetic tree was constructed using MEGA 7.0 software.

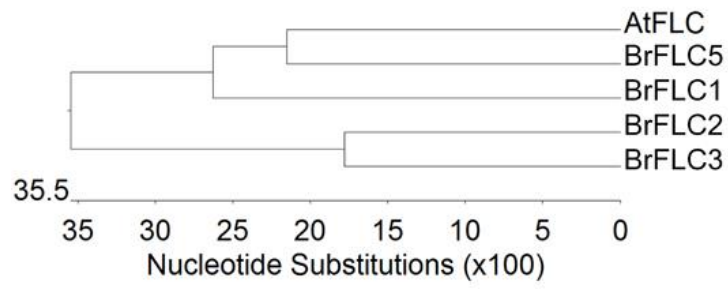

**Supplementary Figure 27. Haplotype analysis of *BrFLC3* in *PC*, *DG*, and *Par* showed that 126 of the 135 lines were classified into seven haplotype groups; however, none of them was specific to *Par*.**

*Par* represents *B. rapa* subsp. *chinensis* var. *parachinensis*, *DG* represents *B. rapa* subsp. *chinensis* var. *Dark-Green*, *PC* represents *B. rapa* subsp. *chinensis* (pak choy).

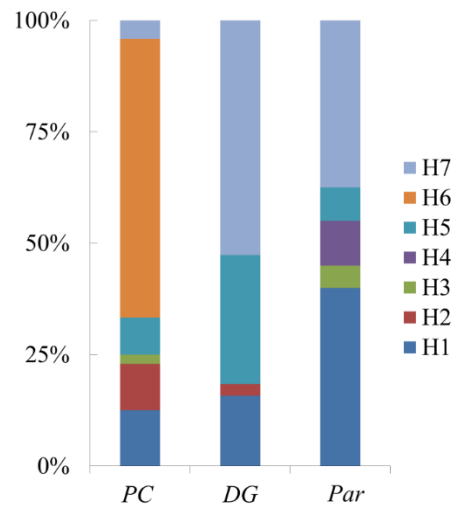

**Supplementary Table 1. Geographical and pedigree information of the 210 *Brassica rapa* lines.**

|                                           | Sequencing ID | Collection number                 | Acession number | Chinese name | Name         | Origin       |
|-------------------------------------------|---------------|-----------------------------------|-----------------|--------------|--------------|--------------|
| <i>subsp. olerifera</i><br>( <i>Ole</i> ) | SRR3201745    | (Cheng et al., 2016) <sup>2</sup> |                 |              |              |              |
|                                           | SRR3201999    |                                   |                 |              |              |              |
|                                           | SRR3201729    |                                   |                 |              |              |              |
|                                           | SRR3201998    |                                   |                 |              |              |              |
|                                           | SRR3201785    |                                   |                 |              |              |              |
|                                           | SRR3201751    |                                   |                 |              |              |              |
|                                           | YY415         | W-SO-035                          | W-SO-035        | /            | /            | Bangladeshi  |
|                                           | YY416         | W-SO-039                          | W-SO-039        | /            | /            | Bangladeshi  |
|                                           | YY420         | W-YS-033                          | W-YS-033        |              | /            | Germany      |
|                                           | YY421         | W-YS-143                          | W-YS-143        | /            | /            | India        |
|                                           | YY149         | 101-180                           |                 | /            | /            | /            |
|                                           | YY316         | YY672-1                           |                 | /            | /            | Tibet, China |
|                                           | YY306         | 6300-1                            |                 | /            | /            | Tibet, China |
| YY315                                     | YY671-1       |                                   | /               | /            | Tibet, China |              |
| YY305                                     | 10400-1       |                                   | /               | /            | Tibet, China |              |
| <i>subsp. rapifera</i><br>( <i>Raf</i> )  | SRR3204346    | (Cheng et al., 2016) <sup>2</sup> |                 |              |              |              |
|                                           | SRR3203997    |                                   |                 |              |              |              |
|                                           | SRR3203915    |                                   |                 |              |              |              |
|                                           | SRR3203830    |                                   |                 |              |              |              |
|                                           | SRR3204355    |                                   |                 |              |              |              |
|                                           | SRR3203657    |                                   |                 |              |              |              |
|                                           | SRR3203802    |                                   |                 |              |              |              |
|                                           | SRR3203777    |                                   |                 |              |              |              |
|                                           | SRR3203854    |                                   |                 |              |              |              |
|                                           | SRR3203920    |                                   |                 |              |              |              |
|                                           | SRR3203805    |                                   |                 |              |              |              |
|                                           | SRR3203839    |                                   |                 |              |              |              |
|                                           | SRR3203886    |                                   |                 |              |              |              |
|                                           | SRR3204261    |                                   |                 |              |              |              |
|                                           | SRR3204245    |                                   |                 |              |              |              |
|                                           | SRR3204221    |                                   |                 |              |              |              |
|                                           | SRR3203925    |                                   |                 |              |              |              |
|                                           | SRR3203633    |                                   |                 |              |              |              |
|                                           | SRR3204219    |                                   |                 |              |              |              |
|                                           | SRR3204020    |                                   |                 |              |              |              |
|                                           | SRR3203804    |                                   |                 |              |              |              |
|                                           | SRR3203781    |                                   |                 |              |              |              |
|                                           | SRR3203680    |                                   |                 |              |              |              |
|                                           | SRR3203685    |                                   |                 |              |              |              |
|                                           | SRR3203779    |                                   |                 |              |              |              |
| SRR3203669                                |               |                                   |                 |              |              |              |
| SRR3203914                                |               |                                   |                 |              |              |              |
| SRR3203985                                |               |                                   |                 |              |              |              |

|                                      |            |          |               |                              |                |
|--------------------------------------|------------|----------|---------------|------------------------------|----------------|
|                                      | SRR3203684 |          |               |                              |                |
|                                      | SRR3203644 |          |               |                              |                |
|                                      | SRR3203803 |          |               |                              |                |
|                                      | SRR3203918 |          |               |                              |                |
|                                      | SRR3203853 |          |               |                              |                |
|                                      | SRR3204220 |          |               |                              |                |
|                                      | SRR3204024 |          |               |                              |                |
|                                      | WJ289      | 721.0002 | /             | /                            |                |
|                                      | WJ287      | 408.0075 | /             | Melon Red Top                | Pakistan       |
|                                      | WJ297      | 408.0032 | /             | purple top white globe       | Europe         |
|                                      | WJ425      | 408.0018 | /             | PURPLE TOP<br>WHITE GLOBE    | America        |
|                                      | WJ295      | 408.0089 | /             | /                            | Europe         |
|                                      | WJ389      | 408.0054 | /             | /                            | Nepal          |
|                                      | WJ384      | 408.0049 | /             | Parple TOP white<br>globe    | FAO            |
|                                      | WJ382      | 408.0047 | /             | purple top WG                | Nepal          |
|                                      | WJ286      | 408.0066 | /             | Golden Ball                  | Pakistan       |
|                                      | WJ377      | 408.0042 | /             | QUARANTINO                   | FAO            |
|                                      | WJ378      | 408.0043 | /             | NATALINO                     | FAO            |
|                                      | WJ361      | 408.0026 | /             | MLLAN PLIRPEE<br>TOP FORCLNG | UK             |
|                                      | WJ292      | ECD-02   | /             | ECD-02                       | Europe         |
|                                      | WJ367      | 408.0032 | /             | MARBLE GREEN<br>TOP          | UK             |
|                                      | WJ290      | MM       | /             | MM                           | Europe         |
|                                      | WJ364      | 408.0029 | /             | IMPERIAL GREEN<br>GLOBE      | UK             |
| <i>subsp.var.nari<br/>nosa (Nar)</i> | TC116      | 18Q-116  | 如皋乌塌菜 2       | RGWTC2                       | /              |
|                                      | TC126      | 18Q-126  | /             | /                            | /              |
|                                      | TC132      | 18Q-132  | 百叶塌菜          | BYTC                         | /              |
|                                      | TC105      | 18Q-105  | /             | /                            | /              |
|                                      | TC003      | TC3      | /             | /                            | /              |
|                                      | TC002      | TC2      | /             | /                            | /              |
|                                      | TC094      | 94#      | /             | /                            | /              |
|                                      | TC001      | TC1      | /             | /                            | /              |
|                                      | TC095      | 95#      | /             | /                            | /              |
| <i>sbsp.chinensi<br/>s (PC)</i>      | PC002      | 18Q-104  | 蚕白菜           | CBC                          | Southern China |
|                                      | PC137      | 18Q-137  | 长梗白菜          | CGBC                         | Southern China |
|                                      | PC114      | 11N-303  | 紫油菜 X 百惠      | ZYCXBH                       | /              |
|                                      | PC094      | 18Q-94   | 紫油菜(小)        | ZYC(X)                       | /              |
|                                      | PC261      | 12N-310  | 紫油菜           | ZYC                          | Northern China |
|                                      | PC001      | 18Q-97   | 红油菜.青梗菜(高)    | HYC.QGC(G)                   | /              |
|                                      | PC121      | 10N-55   | 矮抗.黑叶 4.矮抗    | AK.HY4.AK                    | Southern China |
|                                      | PC128      | 09N-3    | 黑叶 4 月.青梗菜    | HY4Y.QGC                     | /              |
|                                      | PC131      | 11N-336  | 青梗菜           | QGC                          | /              |
|                                      | PC010      | 18Q-10   | 华京.上四 2.华京(矮) | HJ.SS2.HJ(A)                 | /              |

|                                                                                |        |         |  |                         |             |                |
|--------------------------------------------------------------------------------|--------|---------|--|-------------------------|-------------|----------------|
|                                                                                | PC011  | 18Q-11  |  | 华冠×上海四月 8(矮)            | HG×SHSY8(A) | /              |
|                                                                                | PC012  | 18Q-12  |  | 18N-183                 | 18N-183     | /              |
|                                                                                | PC099  | 11N-1   |  | 上海 4 月 4                | SH4Y4       | Southern China |
|                                                                                | PC100  | 10N-53  |  | 东方矮抗. 上海 4 月            | DFAK. SH4Y  | /              |
|                                                                                | PC009  | 18Q-9   |  | 黑叶四月混                   | HYSYH       | /              |
|                                                                                | PC098  | 10N-350 |  | 上海 4 月                  | SH4Y        | Southern China |
|                                                                                | PC249  | 12N-11  |  | 中蔬五月慢深                  | ZSWYMS      | Northern China |
|                                                                                | PC096  | 04N-351 |  | 上海 5 月                  | SH5Y        | Southern China |
|                                                                                | PC021  | 18Q-127 |  | 味美菜(小松菜)                | WMC(XSC)    | /              |
|                                                                                | PC023  | 18Q-131 |  | 抗热 605 青菜               | KR605QC     | /              |
|                                                                                | PC005  | 18Q-115 |  | 虹明青菜                    | HMQC        | /              |
|                                                                                | PC020  | 18Q-125 |  | 青轴 <small>パクチョイ</small> | QINGYOU     | /              |
|                                                                                | PC111  | 18Q-111 |  | 勺菜                      | SC          | /              |
|                                                                                | PC003  | 18Q-106 |  | 矮箕白菜                    | AJBC        | Southern China |
|                                                                                | PC104  | 04N-353 |  | 矮抗青(灰)                  | AKQ(H)      | Southern China |
|                                                                                | PC032  | 18Q-32  |  | 四季青深                    | SJQS        | /              |
|                                                                                | PC008  | 18Q-122 |  | 台湾青江白菜                  | TWQJBC      | /              |
|                                                                                | PC129  | 18Q-129 |  | 日本大头青江白菜                | RBDTQJBC    | /              |
|                                                                                | PC132  | 08N-369 |  | 澳洲抗热清江白                 | AZKRQJB     | Australia      |
|                                                                                | PC250  | 04N-258 |  | 黄金白菜                    | HJBC        | Southern China |
|                                                                                | PC120  | 11N-340 |  | 澳抗显                     | AKX         | Australia      |
|                                                                                | PC106  | 10N-697 |  | 四季青                     | SJQ         | Southern China |
|                                                                                | PC113  | 11N-2   |  | 春华 x 蓟县新四(直)            | CHxJXXS(Z)  | /              |
|                                                                                | PC125  | 10N-696 |  | 春华                      | CH          | Southern China |
|                                                                                | PC243  | 12N-514 |  | 城研青菜                    | CYQC        | Northern China |
|                                                                                | PC244  | 12N-519 |  | 改良 21                   | GL21        | Southern China |
|                                                                                | PC013  | 18Q-13  |  | 北极直                     | BJZ         | /              |
|                                                                                | PC097  | 10N-56  |  | 上海 5 月 3.华玉(旺)          | SH5Y3.HY(W) | /              |
|                                                                                | PC115  | 11N-467 |  | 金夏苣 P1                  | JXZP1       | Japan          |
|                                                                                | PC126  | 11N-339 |  | 华玉                      | HY          | Japan          |
|                                                                                | PC034  | 18Q-34  |  | 夏青(浅)                   | XQ(Q)       | /              |
|                                                                                | PC242  | 12N-510 |  | 冬苣                      | DZ          | Japan          |
|                                                                                | PC127  | 07N-337 |  | 夏帝                      | XD          | Japan          |
|                                                                                | PC116  | 11N-517 |  | 日本华光 P1                 | RBHGP1      | Japan          |
|                                                                                | PC122  | 10N-687 |  | 白沙一号                    | BSYH        | Southern China |
|                                                                                | PC117  | 11N-513 |  | 旗舰 P1                   | QJP1        | Northern China |
|                                                                                | PC119  | 05N-217 |  | 早生华京                    | ZSHJ        | Japan          |
|                                                                                | PC133  | 09N-548 |  | 华冠抗                     | HGK         | Japan          |
|                                                                                | PC118  | 10N-688 |  | 华冠大叶                    | HGDY        | Japan          |
|                                                                                | PC130  | 10N-689 |  | 华冠小                     | HGX         | Japan          |
| <i>ssp. chinensis</i><br><i>var.</i><br><i>parachinensis</i><br>( <i>Par</i> ) | Par165 | 18Q-190 |  | 宝青 50 天油心               | BQ50TYX     | /              |
|                                                                                | Par079 | 18Q-178 |  | 绿满园香脆, 高                | LMYXC, G    | /              |
|                                                                                | Par091 | 18Q-181 |  | 加拿大菜心                   | JNDCX       | /              |
|                                                                                | Par125 | 18Q-187 |  | 翠绿 80 天菜心               | CL80TCX     | /              |
|                                                                                | Par124 | 08N-510 |  | 60 天菜心                  | 60TCX       | Southern China |
|                                                                                | Par013 | 18Q-160 |  | 金苗美绿 702 晚              | JMML702 W   | /              |
|                                                                                | Par117 | 18Q-186 |  | 油绿 702 菜心               | YL702CX     | /              |

|                             |        |           |  |                   |                  |                |
|-----------------------------|--------|-----------|--|-------------------|------------------|----------------|
|                             | Par270 | 11A9-50③  |  | 长合 70 天           | CH70T            | Southern China |
|                             | Par110 | 18Q-185   |  | 金韩 70 天菜心         | JH70TCX          | /              |
|                             | Par272 | 10A9-252① |  | 迟 80 天(柳)         | C80T(L)          | Southern China |
|                             | Par001 | 18Q-155   |  | 金满田 80 天(早直)      | JMT80T(ZZ)       | /              |
|                             | Par269 | 11A9-224⑤ |  | 利隆矮脚 70 天早        | LLAJ70TZ         | Southern China |
|                             | Par010 | 18Q-159   |  | 东莞 70 天尖叶(从)      | DZ70TJY(C)       | /              |
|                             | Par055 |           |  | 粤友迟心 1 号(晚)矮柳     | YYCX1H(W)AL      | /              |
|                             | Par099 | 18Q-183   |  | 圣农粗条 90 天         | SNCT90T          | /              |
|                             | Par023 | 18Q-162   |  | 60 天(周)(晚)        | 60T(Z)(W)        | /              |
|                             | Par006 | 18Q-158   |  | 迟 80 天(大叶, 晚) 翠绿  | C80T(DY, W)CL    | /              |
|                             | Par049 | 18Q-167   |  | 坡头 31 号 早         | PT31H Z          | /              |
|                             | Par033 | 18Q-164   |  | 一哥白沙 45 天 直中      | YGBS45T ZZ       | /              |
|                             | Par063 | 18Q-174   |  | 广东 1 只花(晚 大 叶)(早) | GD1ZH(WDY)(Z)    | /              |
|                             | Par056 | 18Q-170   |  | 金韩秋菊 直立           | JHQJ ZL          | /              |
|                             | Par057 | 18Q-171   |  | 新世纪 20 号, 中       | XSJ20H, Z        | /              |
|                             | Par089 | 18Q-180   |  | 45 天菜心, 早叶少       | 45TCX, ZYS       | /              |
|                             | Par038 | 18Q-166   |  | 019(皱)            | 019 (Z)          | /              |
|                             | Par271 | 11A-74②   |  | 中南 80 天油绿甜菜心      | ZN80TYLTCX       | Southern China |
|                             | Par061 | 18Q-173   |  | 日本油美 1 号(晚)       | RBYM1H(W)        | /              |
|                             | Par077 | 18Q-177   |  | 新苗 T28 细          | XMT28 X          | /              |
|                             | Par037 | 18Q-165   |  | 4 号早              | 4HZ              | /              |
|                             | Par051 | 18Q-168   |  | 香港油青(早)           | XGYQ(Z)          | /              |
|                             | Par265 | 10A9-31①  |  | 范记 50 天早          | FJ50TZ           | Southern China |
|                             | Par002 | 18Q-156   |  | 红亮 85 天(晚)        | HL85T(W)         | /              |
|                             | Par274 | 11A9-8⑦   |  | 利农 5 号(粗)         | LN5H(C)          | Southern China |
|                             | Par275 | 11A9-15①  |  | 宝丰矮脚大叶            | BFAJDY           | Southern China |
|                             | Par031 | 18Q-163   |  | 利隆矮脚 45 天(早)      | LLAJ45T(Z)       | /              |
|                             | Par021 | 18Q-161   |  | 金韩 60 天, 早        | JH60T, Z         | /              |
|                             | Par268 | 10A-96①   |  | 圣农绿宝柳叶 70 天菜心     | SNLBLY70TCX      | Southern China |
|                             | Par277 | 10A9-235③ |  | 惟勤全年粗条(柳)         | WQQNCT(L)        | Southern China |
|                             | Par273 | 11A9-142② |  | 欣农澳洲 5 号早         | XNAZ5HZ          | Southern China |
|                             | Par278 | 11A9-198① |  | 广良油青(芽)           | GLYQ(Y)          | Southern China |
|                             | Par058 | 18Q-172   |  | 农鑫抗病油青(旺)(开展, 晚)  | NXKBYQ(W)(KZ, W) | /              |
|                             | Par266 | 11A9-148③ |  | 广研菜场 60 天油青(晚)    | GYCC60TYQ(W)     | Southern China |
|                             | Par264 | 10A9-73①  |  | 弘农东莞 30 天         | HNDZ30T          | Southern China |
|                             | Par276 | 11A9-2③   |  | 美青一号(晚)           | MQYH(W)          | Southern China |
|                             | Par267 | 11A9-156③ |  | 坡头 60 天浅          | PT60TQ           | Southern China |
| <i>subsp.chinensis (DG)</i> | DG001  | HY/NB1    |  | 苗丰黑叶白菜(直)         | MFHYBC(Z)        | /              |
|                             | DG016  | 18Q-36    |  | 长筒白               | CTB              | /              |
|                             | DG041  | 18Q-123   |  | 葵扇黑叶白菜            | KSHYBC           | /              |
|                             | DG247  | 247#      |  | 白玫瑰深              | BMGS             | Japan          |
|                             | DG006  | HY/NB6    |  | 广良黑叶白 P 深         | GLHYBPS          | /              |
|                             | DG024  | HY/NB24   |  | 华盛玉玲珑 P 浅         | HSYLZPQ          | /              |
|                             | DG109  | 109#      |  | I(典)              | I(D)             | Southern China |



|       |         |  |                         |                        |                |
|-------|---------|--|-------------------------|------------------------|----------------|
| DG023 | HY/NB23 |  | 绿园四季黑叶                  | LYSJHY                 | /              |
| DG004 | HY/NB4  |  | 夏宝黑叶小叶                  | XBHYXY                 | /              |
| DG019 | HY/NB19 |  | 玉兔杂交黑叶                  | YTZJHY                 | /              |
| DG021 | HY/NB21 |  | 玉兔杂交黑叶 P 直              | YTZJHYPZ               | /              |
| DG112 | 112#    |  | 湛江白菜                    | ZJBC                   | Southern China |
| DG135 | 18Q-135 |  | 光泽矮脚黑叶白菜                | GZAJHYBC               | /              |
| DG008 | HY/NB8  |  | 佳信港种奶白菜(杂)              | JXGZNBC(Z)             | /              |
| DG003 | HY/NB3  |  | 尖峰矮脚黑叶白                 | JFAJHYB                | /              |
| DG040 | 18Q-40  |  | 尖峰黑叶白                   | JFHYB                  | /              |
| DG018 | HY/NB18 |  | 旺田黑叶                    | WTHY                   | /              |
| DG038 | 18Q-38  |  | 金冠黑叶                    | JGHY                   | /              |
| DG005 | HY/NB5  |  | 米高梅黑叶深                  | MGMHYS                 | /              |
| DG039 | 18Q-39  |  | 米高梅黑叶浅                  | MGMHYQ                 | /              |
| DG002 | HY/NB2  |  | 欣农中脚葵扇黑叶甜白菜(深)          | XNZJKSHYTBC(S)         | /              |
| DG022 | 18Q-37  |  | 严选黑叶白菜                  | YXHYBC                 | /              |
| DG054 | 18Q-54  |  | 白公主矮脚奶白                 | BGZAJNB                | /              |
| DG129 | 129#    |  | 中脚黑叶浅                   | ZJHYQ                  | /              |
| DG017 | HY/NB17 |  | XP001P 深                | XP001PS                | /              |
| DG049 | 18Q-49  |  | 玉龙 262                  | YL262                  | /              |
| DG025 | HY/NB25 |  | 玉龙 262 展                | YL262Z                 | /              |
| DG108 | 108#    |  | 惠州矮脚奶白(帮厚)              | HZAJNB(BH)             | Southern China |
| DG136 | 18Q-136 |  | 惟勤香港矮脚奶白菜               | WQXGAJNBC              | /              |
| DG026 | HY/NB26 |  | 金地奶白菜旺                  | JDNBCW                 | /              |
| DG007 | HY/NB7  |  | 10 龙湖 161-3 深展          | 10LH161-3SZ            | /              |
| DG009 | HY/NB9  |  | 斗白(大)                   | DB(D)                  | /              |
| DG053 | 18Q-53  |  | 斗白大                     | DBD                    | /              |
| DG246 | 246#    |  | 鹤斗白中                    | HDBZ                   | Southern China |
| DG110 | 110#    |  | 奶白 A                    | NBA                    | Southern China |
| DG123 | 123#    |  | 奶白(弱)                   | NB(R)                  | Southern China |
| DG014 | 18Q-58  |  | 上海五月 3×中脚奶白 2(塌地)       | SHWY3×ZJNB2(TD)        | /              |
| DG111 | 111#    |  | 中脚黑叶深                   | ZJHYS                  | Southern China |
| DG013 | HY/NB13 |  | 黑叶四月混.(乌白叶. II 2)2(浅)   | HYSYH.(WBY. II 2)2(Q)  | /              |
| DG012 | 18Q-55  |  | 上海五月 3×(乌白叶. II 2)2(脉显) | SHWY3×(WBY. II 2)2(MX) | /              |
| DG048 | 18Q-48  |  | /                       | /                      |                |

**Supplementary Table 2. The parameters and confidence intervals inferred in  $\partial a \partial i$  simulation.**

These parameters correspond to those displayed in Figure 1 A. The 95% confidence interval (CI) was calculated using the Godambe bootstrapping method. Unit of absolute effective population size: Individual; unit of absolute time: Yearable.

| Parameter      | Relative  |        | Absolute value       |        | Absolute value     |        |
|----------------|-----------|--------|----------------------|--------|--------------------|--------|
|                | value (v) | 95% CI | ( $\mu_1 = 1.5E-8$ ) | 95% CI | ( $\mu_2 = 9E-9$ ) | 95% CI |
| $N_{e_{DG}}$   | 0.028     | 0.0038 | 627                  | 85     | 1045               | 143    |
| $N_{e_{Par}}$  | 0.35      | 0.13   | 7938                 | 2858   | 13250              | 4730   |
| T1             | 0.027     | 0.006  | 1220                 | 278    | 2038               | 451    |
| T2             | 0.04      | 0.005  | 1838                 | 230    | 3050               | 382    |
| $\theta$       | 10446.25  |        |                      |        |                    |        |
| Log-likelihood | 20487.5   |        |                      |        |                    |        |
| $N_{e_{PC}}$   |           |        | 5760                 |        | 7250               |        |

**Supplementary Table 3. Summary of the QTL mapping of flowering loci in which *BrFLCs* are candidates in *Brassica rapa* crops.**

| Reference                                                       | Population used                                                                                                                                                                 | Planting conditions used for collecting flowering time data |                                |                                             | Trait                                          | QTL ID in the paper | Contribution Explain (%) | BrFLCs contained |
|-----------------------------------------------------------------|---------------------------------------------------------------------------------------------------------------------------------------------------------------------------------|-------------------------------------------------------------|--------------------------------|---------------------------------------------|------------------------------------------------|---------------------|--------------------------|------------------|
|                                                                 |                                                                                                                                                                                 | Vernalization                                               | Growth temperature             | Duration of day                             |                                                |                     |                          |                  |
| Lou et al, 2008 <sup>3</sup> ;<br>Zhao et al, 2010 <sup>4</sup> | DH population 38 derived from PC-175 (pak choi) cross with YS-143 (Yellow Sarson)                                                                                               | without vernalization                                       | greenhouse 24/18°C (day/night) | 16 h                                        | Flowering Time without vernalization           | FLQTL-1 (A02)       | 63.8                     | BrFLC2           |
|                                                                 |                                                                                                                                                                                 | vernalized in the dark at 5°C for 18d                       |                                |                                             | Flowering time after 18d vernalization         | FLQTL-2 (A02)       | 30.9                     | BrFLC2           |
|                                                                 |                                                                                                                                                                                 | vernalized in the dark at 5°C for 31d                       |                                |                                             | vernalization response after 18d vernalization | VRQTL-1 (A02)       | 71.9                     | BrFLC2           |
|                                                                 |                                                                                                                                                                                 |                                                             |                                |                                             | vernalization response after 31d vernalization | VRQTL-2 (A02)       | 77.1                     | BrFLC2           |
| Li et al, 2009 <sup>5</sup>                                     | F2 population derived from "Yellow Sarson C634" (early flowering Indian oilseed rape) cross with a DH line P11 of "Osome"(commercial variety of late flowering leafy vegetable) |                                                             | unheated greenhouse            | October 2007 to April 2008 in Sendai, Japan | Bolting Time in unheated greenhouse            | DBOQTL1 (A02)       | 16                       | BrFLC2           |
|                                                                 |                                                                                                                                                                                 |                                                             | heated greenhouse above 10°C   |                                             | Bolting time in heated green house             | DBOQTL1 (A02)       | 14                       | BrFLC2           |
|                                                                 |                                                                                                                                                                                 |                                                             |                                |                                             |                                                | DBOQTL3 (A10)       | 19.9                     | BrFLC1           |
|                                                                 |                                                                                                                                                                                 |                                                             |                                |                                             | Budding Time in unheated greenhouse            | DBUQTL1 (A02)       | 27.9                     | BrFLC2           |
|                                                                 |                                                                                                                                                                                 |                                                             |                                |                                             | Budding Time in heated greenhouse              | DBUQTL1 (A02)       | 21.7                     | BrFLC2           |

|                                   |                                                                                                                                   |                                         |                                                                     |                                                                                                         |                                                                                                            |                  |      |                                |
|-----------------------------------|-----------------------------------------------------------------------------------------------------------------------------------|-----------------------------------------|---------------------------------------------------------------------|---------------------------------------------------------------------------------------------------------|------------------------------------------------------------------------------------------------------------|------------------|------|--------------------------------|
|                                   |                                                                                                                                   |                                         |                                                                     |                                                                                                         |                                                                                                            | DBUQTL2<br>(A10) | 26.4 | BrFLC1                         |
|                                   |                                                                                                                                   |                                         |                                                                     |                                                                                                         | Flowering Time in unheated greenhouse                                                                      | DFLQTL1(A02)     | 18.4 | BrFLC2                         |
|                                   |                                                                                                                                   |                                         |                                                                     |                                                                                                         | Flowering Time in heated greenhouse                                                                        | DFLQTL1(A02)     | 18.1 | BrFLC2                         |
|                                   |                                                                                                                                   |                                         |                                                                     |                                                                                                         |                                                                                                            | DFLQTL2(A10)     | 26.1 | BrFLC1                         |
| Yuan et al, 2009 <sup>6</sup>     | 30 accessions with a wide range of flowering-time variation (19 DH lines and 11 inbred lines)                                     | vernalized at 4 °C in the dark for 25 d | growth chamber at 25/20°C(day/night)<br>grown in the open field.    | 16 h<br>transplanted on 21 March 2007                                                                   | Average of flowering time from five individuals in the growth chamber and 15 individuals in the open field |                  |      | SNP in intron 6 of BrFLC1      |
| Kakizaki et al, 2011 <sup>7</sup> | F2 population derived from Chukanbohon Nou 6 gou (PL6, Chinese cabbage) cross with Chukanbohon Nou 7 gou (A9709, Chinese cabbage) | without vernalization                   | grown in the field                                                  | February to April 2009                                                                                  | Bolting Time                                                                                               | field-QTL1 (R10) | 30.7 | BrFLC1                         |
|                                   |                                                                                                                                   |                                         |                                                                     |                                                                                                         |                                                                                                            | field-QTL2 (R03) | 27.6 | BrFLC5                         |
| Wu et al, 2012 <sup>8</sup>       | 159 <i>B.rapa</i> accessions                                                                                                      |                                         | grown in the open field. The lowest mean daily temperature is 8.2°C | 12 October 2009 to 1 April 2010. The day length varied between 142.7 h in October and 244.8 h in April. | Days to flowering both in the open field and in the greenhouse                                             |                  |      | InDel across exon 4 and intron |

|                                    |                                                                                                                                                                                                                                                                                  |                       |                                                                                                                                                                                                                                  |                                                                                                                                                                                            |                                                                                                         |                 |      |                 |
|------------------------------------|----------------------------------------------------------------------------------------------------------------------------------------------------------------------------------------------------------------------------------------------------------------------------------|-----------------------|----------------------------------------------------------------------------------------------------------------------------------------------------------------------------------------------------------------------------------|--------------------------------------------------------------------------------------------------------------------------------------------------------------------------------------------|---------------------------------------------------------------------------------------------------------|-----------------|------|-----------------|
|                                    |                                                                                                                                                                                                                                                                                  |                       | greenhouse 15-25°C                                                                                                                                                                                                               | 23 October 2010 to 20 March 2011. The shortest days are in winter (581.6 h in total during December to February), and the longest days are in spring (778.8 h in total from March to May). |                                                                                                         |                 |      | 4 of BrFLC2     |
| Dong Xiao 2013 <sup>9</sup>        | A <i>B. rapa</i> DH population DH68 of 163 DH lines was established from three F <sub>1</sub> plants of a cross between Yellow sarson YS-143 (accession no. FIL500) as the female parent and Pak choi PC-175 (cultivar: Nai Bai Cai; accession no. VO2B0226) as the male parent. |                       | Plants were grown in a heated greenhouse (18–21 °C) at Wageningen, The Netherlands. When the days were shorter than 16 h, artificial light was supplied until a photoperiod (200 μmol m <sup>-2</sup> s <sup>-1</sup> ) of 16 h. |                                                                                                                                                                                            | Flowering time was defined as number of days from transplanting to appearance of the first open flower. | FLC1_A10.<br>RL | 18.6 | FLC1_A1<br>0.RL |
|                                    |                                                                                                                                                                                                                                                                                  |                       |                                                                                                                                                                                                                                  |                                                                                                                                                                                            |                                                                                                         | FLC2_A02.<br>RL | 71.4 | FLC2_A0<br>2.RL |
|                                    |                                                                                                                                                                                                                                                                                  |                       |                                                                                                                                                                                                                                  |                                                                                                                                                                                            |                                                                                                         | FLC3_A03.<br>RL | 22.7 | FLC3_A0<br>3.RL |
|                                    |                                                                                                                                                                                                                                                                                  |                       |                                                                                                                                                                                                                                  |                                                                                                                                                                                            |                                                                                                         | FLC5_A03.<br>RL | 17.9 | FLC5_A0<br>3.RL |
| Dong Xiao et al, 2013 <sup>9</sup> | DH population 68 derived from YS-143 (Yellow Sarson) cross with PC-175 (pak choi)                                                                                                                                                                                                | without vernalization | 18-21 °C                                                                                                                                                                                                                         | 16 h                                                                                                                                                                                       | Flowering time                                                                                          | A02             | 33.5 | BrFLC2          |
| Kitamoto et al,                    | F <sub>2</sub> population derived from                                                                                                                                                                                                                                           | venalized at          | 25/18°C (day/night)                                                                                                                                                                                                              | 16 h                                                                                                                                                                                       | Number of days to                                                                                       | R2              | 46   | BrFLC2          |

|                              |                                                                                                                                 |                                                                           |                                    |       |                               |                |        |        |
|------------------------------|---------------------------------------------------------------------------------------------------------------------------------|---------------------------------------------------------------------------|------------------------------------|-------|-------------------------------|----------------|--------|--------|
| 2014 <sup>10</sup>           | Tuskena No.2 (extremely late bolting non-heading leafy vegetable) cross with "Early"(early bolting Chinese cabbage, Sakata Co.) | 4°C with a 16 h photoperiod for 40 days                                   |                                    |       | bolting                       | R3             | 9.9    | BrFLC3 |
|                              |                                                                                                                                 |                                                                           |                                    |       | Number of days to flowering   | R2             | 43.6   | BrFLC2 |
|                              |                                                                                                                                 |                                                                           |                                    |       |                               | R3             | 10.2   | BrFLC3 |
|                              |                                                                                                                                 |                                                                           |                                    |       | Number of leaves to flowering | R2             | 46.2   | BrFLC2 |
| R3                           | 7.7                                                                                                                             | BrFLC3                                                                    |                                    |       |                               |                |        |        |
| Su et al, 2018 <sup>11</sup> | A collection of 194 Chinese cabbage inbred lines, including 40 spring lines, 37 summer lines, and 117 autumn lines              | vernalized at 4°C under a long-day regime (16/8 h day/night) for 5 weeks. | greenhouse 25 °C /20°C (day/night) | 16 h  | Bolting time                  | <i>ftA10.1</i> |        | BrFLC1 |
| D. Xiao 2018 <sup>12</sup>   | DH population 68 derived from YS-143 (Yellow Sarson) cross with PC-175 (pak choi)                                               | 08Sept-L                                                                  | 10-24°C/16hrs                      | 16    | Days to flowering             | fQTL-3         |        | BrFLC2 |
|                              |                                                                                                                                 | 09Apr-L                                                                   | 22-35°C/16-17hrs                   | 16-17 |                               | fQTL-3         |        | BrFLC2 |
|                              |                                                                                                                                 | 10Jan-L                                                                   | 10-24°C/16hrs                      | 16    |                               | fQTL-3         |        | BrFLC2 |
|                              |                                                                                                                                 | 10Feb-High-L                                                              | 14-27°C/16hrs                      | 16    |                               | fQTL-3         |        | BrFLC2 |
|                              |                                                                                                                                 | 10Feb-High-S                                                              | 14-27°C/8 hrs                      | 8     |                               | fQTL-3         |        | BrFLC2 |
|                              |                                                                                                                                 | 10Feb-Low-L                                                               | 6-22°C/16 hrs                      | 16    |                               | fQTL-3         |        | BrFLC2 |
|                              |                                                                                                                                 | 10Feb-Low-S                                                               | 6-22°C/8hrs                        | 8     |                               | fQTL-3         |        | BrFLC2 |
|                              |                                                                                                                                 | 11Mar-L                                                                   | 22-35°C/16-17hrs                   | 16-17 |                               | fQTL-3         |        | BrFLC2 |
|                              |                                                                                                                                 | 11Mar-S                                                                   | 22-35°C/8 hrs                      | 8     | fQTL-3                        |                | BrFLC2 |        |
|                              |                                                                                                                                 | 08Sept-L                                                                  | 10-24°C/16hrs                      | 16    | Days to flowering             | fQTL-6         |        | BrFLC5 |
|                              |                                                                                                                                 | 09Apr-L                                                                   | 22-35°C/16-17hrs                   | 16-17 |                               | fQTL-6         |        | BrFLC5 |
|                              |                                                                                                                                 | 10Jan-L                                                                   | 10-24°C/16hrs                      | 16    |                               | fQTL-6         |        | BrFLC5 |
|                              |                                                                                                                                 | 10Feb-High-L                                                              | 14-27°C/16hrs                      | 16    |                               | fQTL-6         |        | BrFLC5 |
|                              |                                                                                                                                 | 10Feb-High-S                                                              | 14-27°C/8 hrs                      | 8     |                               | fQTL-6         |        | BrFLC5 |
|                              |                                                                                                                                 |                                                                           | fQTL-6                             |       |                               | BrFLC5         |        |        |

|  |  |             |                  |       |  |        |  |        |
|--|--|-------------|------------------|-------|--|--------|--|--------|
|  |  | 10Feb-Low-L | 6-22°C/16 hrs    | 16    |  | fQTL-6 |  | BrFLC5 |
|  |  | 10Feb-Low-S | 6-22°C/8hrs      | 8     |  | fQTL-6 |  | BrFLC5 |
|  |  | 11Mar-L     | 22-35°C/16-17hrs | 16-17 |  | fQTL-6 |  | BrFLC5 |
|  |  | 11Mar-S     | 22-35°C/8 hrs    | 8     |  | fQTL-6 |  | BrFLC5 |

**Supplementary Table 4. Primers used in this study**

| Primer name                 | Sequence 5'-3'                               |
|-----------------------------|----------------------------------------------|
| Vector construction primers |                                              |
| AtJMJ18pro BamHI-F          | GGATCCC GTTCAATTTACTCCTACTCTC                |
| AtJMJ18pro SpeI-R           | ACTAGTATGAATTGAAAAATCAATACTACTC              |
| BrJMJ18CDSEcoRISpeI-F       | GAATTCAC TAGTATGGAGCATCTCAGTGTTGC            |
| BrJMJ18CDSNCKpnI-R          | GGTACCCATCAAATCCACTCCGAAAAG                  |
| JMJ18 CDSEcoRI-F            | GGATCCGAATTCATGGAGCATCTCAGTG                 |
| JMJ18 CDSSacI-R             | TCGACGGAGCTCCATCAAATCCACTCCGA                |
| BrJMJ18 DT1-BsF             | ATATATGGTCTCGATTGAAATGGACACCGTCTGTGGGTT      |
| BrJMJ18 DT1-F0              | TGAAATGGACACCGTCTGTGGGTTTTAGAGCTAGAAATAGC    |
| BrJMJ18 DT2-R0              | AACTTTCTTG TAAAACCCGCTTCAATCTCTTAGTCGACTCTAC |
| BrJMJ18 DT2-BsR             | ATTATTGGTCTCGAAACTTTCTTG TAAAACCCGCTTCAA     |
| qRT-PCR primers             |                                              |
| BrFLC1 RT-F                 | GCTGGAAGAGGAGAACCATGTTTTGGC                  |
| BrFLC1 RT-R                 | CTATAAAAATTCCTACTCCACTAACCCC                 |
| BrFLC2 RT-F                 | TCTGATGTAAGCGTCGACTCCCTCGTTC                 |
| BrFLC2 RT-R                 | GATTATTCTTCTCCATCTGGCTAGCCAAACCC             |
| BrFLC3 RT-F                 | GTCGGTGGTGTAAAGCGTGGACACCCTC                 |
| BrFLC3 RT-R                 | CTTCTTCTCCTTCTGGCCAGCCAAAGCC                 |
| BrFLC5 RT-F                 | AGAAATCAAGCGAATCGAGAAAAACAG                  |
| BrFLC5 RT-R                 | CTATCCCCGGAGGAGAAGCTGTAGAG                   |
| BrJMJ18NewRT-F              | GGGAACTCTCAGCTTCTTCCGTTG                     |
| BrJMJ18NewRT-R              | CACCAAGCTCAAAGACTCCCTAC                      |
| BraA09g029800-F             | ATGGCGTCTCTTCAGCAAACCATGTTATC                |
| BraA09g029800-R             | GAGTATCGTTCCTCTTCGCAACATCTG                  |
| BraA04g028660-F             | ATGTCAATCCTCCAGCTCTCTAGCTCTTC                |
| BraA04g028660-R             | CTCATAAGCCAAACCGGAGGTCTGTGTC                 |
| BraA07g034950-F             | ATGGCACTCTCACGTCTCTCATCTCG                   |
| BraA07g034950-R             | GGAAGAAGGAGAGGAGCTCTTGGG                     |
| BraA07g022160-F             | ATGGAGACCAGCGTCATTAGCTACTC                   |
| BraA07g022160-R             | CACCATTGTTCTTCGCCTTCGTGGC                    |
| BraA08g004460-F             | CAACACCGTGCCGTTTTCTGAAACCATG                 |
| BraA08g004460-R             | GATAGGTTTCTGCTTGGTGGAAGCTGAAG                |
| GADPH-F                     | CAGGTTTGGAATTGTGCGAGG                        |



|                  |                                 |
|------------------|---------------------------------|
| GADPH-R          | GAGCTGTGGAAGCACCTTTC            |
| AtFLC RT-F       | GGCTAGCCAGATGGAGAATAATCA        |
| AtFLC RT-R       | CCGCCGATTTAAGGTGGCTA            |
| AtFT RT-F        | CTGGAACAACCTTTGGCAAT            |
| AtFT RT-R        | TACTGTGTTGCCTGCCAAG             |
| ACTIN2-F         | GGTAACATTGTGCTCAGTGGTGG         |
| ACTIN2-R         | AACGACCTTAATCTTCATGCTGC'        |
| ChIP PCR primers |                                 |
| FLC_157_F        | CGACAAGTCACCTTCTCCAAA           |
| FLC_314_R        | AGGGGGAACAAATGAAAACC            |
| ACTIN_728_F      | GATATTCAGCCACTTGTCTGTG          |
| ACTIN_812_R      | CTTACACATGTACAACAAAGAAGG        |
| BrFLC1 CHIP 2-F  | TCAGCTTCCGTTCTCTGTGACGC         |
| BrFLC1 CHIP 2-R  | CCACACAAGATTCGCAGGAAGTATT       |
| BrFLC2 CHIP 2-F  | ATGGGAAGAAAGAACTAGAGATCAAG      |
| BrFLC2 CHIP 2-R  | GAAGTTGTAAAGCTTGCCGGAGGCT       |
| BrFLC3 CHIP 2-F  | CTTTCTGTTCTCTGCGATGCATCCGTCG    |
| BrFLC3 CHIP 2-R  | CAGAAGCTTAAAAGGCTAATAAAG        |
| BrFLC5 CHIP 2-F  | ACAGTAGCAGACAAGTCACCTTCTGC      |
| BrFLC5 CHIP 2-R  | GAGGAGAAGCTGTAGAGCTTGTCGGA      |
| BraA06g002250-F  | CCGAGGAAGTTCAAGCTATCCTATTGCTAAG |
| BraA06g002250-R  | CCACCAGACCTGGTAAACTTACCACTCTC   |
| GADPH-F          | CAGGTTTGAATTGTGCGAGG            |
| GADPH-R          | GAGCTGTGGAAGCACCTTTC            |

## Reference

1. Yang, H., et al. Distinct phases of Polycomb silencing to hold epigenetic memory of cold in *Arabidopsis*. *Science* **357**, 1142-1145(2017).10.1126/science.aan1121
2. Cheng, F., et al. Subgenome parallel selection is associated with morphotype diversification and convergent crop domestication in *Brassica rapa* and *Brassica oleracea*. *Nature genetics* **48**, 1218-24(2016).10.1038/ng.3634
3. Lou, P., et al. Quantitative trait loci for glucosinolate accumulation in *Brassica rapa* leaves. *The New phytologist* **179**, 1017-1032(2008).10.1111/j.1469-8137.2008.02530.x
4. Zhao, J., et al. *BrFLC2* (*FLOWERING LOCUS C*) as a candidate gene for a vernalization response QTL in *Brassica rapa*. *Journal of experimental botany* **61**, 1817-25(2010).10.1093/jxb/erq048
5. Li, F., Kitashiba, H., Inaba, K.&Nishio, T. A *Brassica rapa* linkage map of EST-based SNP markers for identification of candidate genes controlling flowering time and leaf morphological traits. *DNA research: an international journal for rapid publication of reports on genes and genomes* **16**, 311-23(2009).10.1093/dnares/dsp020
6. Yuan, Y. X., et al. A naturally occurring splicing site mutation in the *Brassica rapa FLC1* gene is associated with variation in flowering time. *Journal of experimental botany* **60**, 1299-308(2009).10.1093/jxb/erp010
7. Kakizaki, T., et al. Identification of quantitative trait loci controlling late bolting in Chinese cabbage (*Brassica rapa L.*) parental line Nou 6 gou. *Breeding Science* **61**, 151-159(2011).10.1270/jsbbs.61.151
8. Wu, J., et al. A naturally occurring InDel variation in *BraA.FLC.b* (*BrFLC2*) associated with flowering time variation in *Brassica rapa*. *BMC plant biology* **12**, 151(2012).10.1186/1471-2229-12-151
9. Xiao, D., et al. The *Brassica rapa FLC* homologue *FLC2* is a key regulator of flowering time, identified through transcriptional co-expression networks. *Journal of experimental botany* **64**, 4503-16(2013).10.1093/jxb/ert264
10. Kitamoto, N., Yui, S., Nishikawa, K., Takahata, Y.&Yokoi, S. A naturally occurring long insertion in the first intron in the *Brassica rapa FLC2* gene causes delayed bolting. *Euphytica* **196**, 213-223(2014).10.1007/s10681-013-1025-9
11. Su, T., et al. A Genomic Variation Map Provides Insights into the Genetic Basis of Spring Chinese Cabbage (*Brassica rapa ssp. pekinensis*) Selection. *Molecular plant* **11**, 1360-1376(2018).10.1016/j.molp.2018.08.006
12. Xiao, D., et al. Genetic dissection of flowering time in *Brassica rapa* responses to temperature and photoperiod. *Plant science: an international journal of experimental plant biology* **280**, 110-119(2019).10.1016/j.plantsci.2018.10.027
