# Supplementary material for: Temperature-dependent jumonji demethylase modulates flowering time by targeting H3K36me2/3 in Brassica rapa
Source: PubMed Central journal article supplement (PMC11211497; doi:10.1038/s41467-024-49721-z), 2024-06-28
Supplement: 41467_2024_49721_MOESM12_ESM.pdf [file 41467_2024_49721_MOESM12_ESM.pdf]

## Reporting Summary

Nature Portfolio wishes to improve the reproducibility of the work that we publish. This form provides structure for consistency and transparency in reporting. For further information on Nature Portfolio policies, see our [Editorial Policies](#) and the [Editorial Policy Checklist](#).

### Statistics

For all statistical analyses, confirm that the following items are present in the figure legend, table legend, main text, or Methods section.

n/a Confirmed

- The exact sample size ( $n$ ) for each experimental group/condition, given as a discrete number and unit of measurement
- A statement on whether measurements were taken from distinct samples or whether the same sample was measured repeatedly
- The statistical test(s) used AND whether they are one- or two-sided  
*Only common tests should be described solely by name; describe more complex techniques in the Methods section.*
- A description of all covariates tested
- A description of any assumptions or corrections, such as tests of normality and adjustment for multiple comparisons
- A full description of the statistical parameters including central tendency (e.g. means) or other basic estimates (e.g. regression coefficient) AND variation (e.g. standard deviation) or associated estimates of uncertainty (e.g. confidence intervals)
- For null hypothesis testing, the test statistic (e.g.  $F$ ,  $t$ ,  $r$ ) with confidence intervals, effect sizes, degrees of freedom and  $P$  value noted  
*Give  $P$  values as exact values whenever suitable.*
- For Bayesian analysis, information on the choice of priors and Markov chain Monte Carlo settings
- For hierarchical and complex designs, identification of the appropriate level for tests and full reporting of outcomes
- Estimates of effect sizes (e.g. Cohen's  $d$ , Pearson's  $r$ ), indicating how they were calculated

*Our web collection on [statistics for biologists](#) contains articles on many of the points above.*

### Software and code

Policy information about [availability of computer code](#)

Data collection Zeiss Zen software (v 14.0.0.201) were used to acquire images. LightCycler 480 software were used to acquire qRT-PCR data.

Data analysis Pod and hypocotyl length of Arabidopsis and Par plants were photographed and measured using Image J software (<https://imagej.net/ij/download.html>). Adobe Photoshop (v CS5) was used to crop and combine images. Plants phenotype and qRT-PCR data were analyzed using Microsoft excel (2013). Bar graphs and box-and-whisker plots were generated using OriginPro 2022 (<https://www.originlab.com/>). Data processing, SNP calling, population genetic analyses and gene flow estimates were conducted as described in Su et al (2018). Filtered reads were mapped to the reference genome using the “mem” algorithm of the Burrows-Wheeler Aligner (version 0.7.5a-r405). The mapping results were processed by sorting and duplicate marking using functions in SAMTOOLS (Li et al., 2009) and PICARD (<http://broadinstitute.github.io/picard/>), local realignment around indels was performed using Indel-Realigner in GATK (McKenna et al., 2010) and HaplotypeCaller in GATK was used to call SNPs and small InDels (Insertion/Deletions). The phylogenetic tree visualizing, editing and root assigning were performed using ITOL (<http://itol.embl.de/>). The software PopLDdecay (<https://github.com/BGI-shenzhen/PopLDdecay>) was used to calculate linkage disequilibrium (LD). FST was calculated using VCFtools (v 0.1.13).

For manuscripts utilizing custom algorithms or software that are central to the research but not yet described in published literature, software must be made available to editors and reviewers. We strongly encourage code deposition in a community repository (e.g. GitHub). See the Nature Portfolio [guidelines for submitting code & software](#) for further information.

## Data

Policy information about [availability of data](#)

All manuscripts must include a [data availability statement](#). This statement should provide the following information, where applicable:

- Accession codes, unique identifiers, or web links for publicly available datasets
- A description of any restrictions on data availability
- For clinical datasets or third party data, please ensure that the statement adheres to our [policy](#)

The ChIP-seq data is accessible on NCBI under the GEO accession number GSE223969. All the raw sequencing data are archived at Genome Sequence Archive of China National Center for Bioinformation (<https://www.cncb.ac.cn/>) with the accession number PRJCA025632.

## Research involving human participants, their data, or biological material

Policy information about studies with [human participants or human data](#). See also policy information about [sex, gender \(identity/presentation\), and sexual orientation](#) and [race, ethnicity and racism](#).

|                                                                    |     |
|--------------------------------------------------------------------|-----|
| Reporting on sex and gender                                        | N/A |
| Reporting on race, ethnicity, or other socially relevant groupings | N/A |
| Population characteristics                                         | N/A |
| Recruitment                                                        | N/A |
| Ethics oversight                                                   | N/A |

Note that full information on the approval of the study protocol must also be provided in the manuscript.

## Field-specific reporting

Please select the one below that is the best fit for your research. If you are not sure, read the appropriate sections before making your selection.

Life sciences       Behavioural & social sciences       Ecological, evolutionary & environmental sciences

For a reference copy of the document with all sections, see [nature.com/documents/nr-reporting-summary-flat.pdf](https://nature.com/documents/nr-reporting-summary-flat.pdf)

## Life sciences study design

All studies must disclose on these points even when the disclosure is negative.

|                 |                                                                                                                                                                                                                                                                                                                                                                                                                                                                                                         |
|-----------------|---------------------------------------------------------------------------------------------------------------------------------------------------------------------------------------------------------------------------------------------------------------------------------------------------------------------------------------------------------------------------------------------------------------------------------------------------------------------------------------------------------|
| Sample size     | For phenotyping of Arabidopsis and Par plants, 15 individual plants of each line were measured. For tobacco leaf transient transformation experiment, images of at least 30 epidermis cells expressing each allele of BrJM18-GFP protein under NC or HS condition were acquired using the confocal laser scanning system Zeiss LSM510, respectively. BrJM18-GFP protein was localized in the nucleus without exception. Sample size was chosen based on previous experience and standards in the field. |
| Data exclusions | Data were not excluded from analysis.                                                                                                                                                                                                                                                                                                                                                                                                                                                                   |
| Replication     | The phenotyping and transient transformation experiments were repeated for three times. All attempts of replication were successful and gave similar results.                                                                                                                                                                                                                                                                                                                                           |
| Randomization   | All planted arabidopsis and Par plants were used in the phenotyping experiment. And the epidermis cell were selected randomly in the tobacco transient transformation experiment.                                                                                                                                                                                                                                                                                                                       |
| Blinding        | The persons who performing the phenotyping and transient transformation experiments were unaware of the sample identity. These data was analyzed in a double-blind approach.                                                                                                                                                                                                                                                                                                                            |

## Reporting for specific materials, systems and methods

We require information from authors about some types of materials, experimental systems and methods used in many studies. Here, indicate whether each material, system or method listed is relevant to your study. If you are not sure if a list item applies to your research, read the appropriate section before selecting a response.

## Materials &amp; experimental systems

## Methods

| n/a                                 | Involved in the study                                  |
|-------------------------------------|--------------------------------------------------------|
| <input type="checkbox"/>            | <input checked="" type="checkbox"/> Antibodies         |
| <input checked="" type="checkbox"/> | <input type="checkbox"/> Eukaryotic cell lines         |
| <input checked="" type="checkbox"/> | <input type="checkbox"/> Palaeontology and archaeology |
| <input checked="" type="checkbox"/> | <input type="checkbox"/> Animals and other organisms   |
| <input checked="" type="checkbox"/> | <input type="checkbox"/> Clinical data                 |
| <input checked="" type="checkbox"/> | <input type="checkbox"/> Dual use research of concern  |
| <input type="checkbox"/>            | <input checked="" type="checkbox"/> Plants             |

| n/a                                 | Involved in the study                           |
|-------------------------------------|-------------------------------------------------|
| <input type="checkbox"/>            | <input checked="" type="checkbox"/> ChIP-seq    |
| <input checked="" type="checkbox"/> | <input type="checkbox"/> Flow cytometry         |
| <input checked="" type="checkbox"/> | <input type="checkbox"/> MRI-based neuroimaging |

## Antibodies

|                 |                                                                                                                                                                                                                                                                                                                                                                                                                                                                                                                                                                                                                                                                                                                                                                                                                                                                                                                                                                               |
|-----------------|-------------------------------------------------------------------------------------------------------------------------------------------------------------------------------------------------------------------------------------------------------------------------------------------------------------------------------------------------------------------------------------------------------------------------------------------------------------------------------------------------------------------------------------------------------------------------------------------------------------------------------------------------------------------------------------------------------------------------------------------------------------------------------------------------------------------------------------------------------------------------------------------------------------------------------------------------------------------------------|
| Antibodies used | Antibodies against the following proteins were used: GFP (HT801-01, TransGen Biotech, Beijing, China), $\beta$ -Tubulin (HC101, TransGen Biotech, Beijing, China), Histone H3 mono/di/tri methyl K4 (ab8895/ab32356/ab213224, Abcam, Cambridge, MA, USA), Histone H3 mono/di/tri methyl K9 (ab176880/ab32521/ab176916, Abcam, Cambridge, MA, USA), Histone H3 Histone H3 mono/di/tri methyl K27 (ab194688/ab24684/ab195477, Abcam, Cambridge, MA, USA), and Histone H3 mono/di/tri methyl K36 (ab176920/ab176921/ab195489, Abcam, Cambridge, MA, USA). Anti-BrJM18 antibodies were produced by immunizing rabbits with a recombinantly expressed BrJM18 protein fragment (amino acids 1–133) expressed in <i>Escherichia coli</i> and purified using an BrJM18 antigen column (HuaBio, Hangzhou, China). IRDye 680RD Goat anti-mouse (926-68070, LI-COR, Lincoln, NE, USA) or anti rabbit (926-68071, LI-COR, Lincoln, NE, USA) antibodies were used as secondary antibodies. |
| Validation      | Antibodies from TransGen Biotech and Abcam have been validated by the manufacturers by immunoblotting. Secondary antibodies from LI-COR have been validated by the manufacturer by dot blot and and/or solid-phase adsorbed for minimal cross-reactivity with human, rabbit, goat, rat, and horse serum proteins. Anti-BrJM18 antibody has been validated by HuaBio company and us by immunoblotting.                                                                                                                                                                                                                                                                                                                                                                                                                                                                                                                                                                         |

## Plants

|                       |                                                                                                                                                                                                                                                                                                                                                                                                                                                                                                                                                                                                                                                                                                                                                                                                                                                                                                                                                                                                                                                                                                                                                   |
|-----------------------|---------------------------------------------------------------------------------------------------------------------------------------------------------------------------------------------------------------------------------------------------------------------------------------------------------------------------------------------------------------------------------------------------------------------------------------------------------------------------------------------------------------------------------------------------------------------------------------------------------------------------------------------------------------------------------------------------------------------------------------------------------------------------------------------------------------------------------------------------------------------------------------------------------------------------------------------------------------------------------------------------------------------------------------------------------------------------------------------------------------------------------------------------|
| Seed stocks           | Arabidopsis Col-0 seeds were obtained from the European Arabidopsis stock center. A collection of 210 varieties of different <i>B. rapa</i> morphotypes were used for genetic structure and selection analyses. These inbred Brassica rapa lines were collected by the co-authors from all over the world and self-pollinated for at least six generations. The origin locations were listed in Table S1. The inbred Brassica rapa inbred lines for plants BrJM18 and BrJM18- <i>gfp</i> were generated in the field and in the greenhouse. Inbred lines were used for BrJM18 alleles were produced for analysis on T2 generation. The subsp. chinensis var. parachinensis (Par) BrJM18 overexpression and gene edited plants were generated by Agrobacterium-mediated transformation using cotyledonary petiole as explant. For 35S::BrJM18: <i>gfp</i> transgenic Par plants, one independent line of each BrJM18 alleles was used for analysis on T1 generation. The BrJM18 gene-edited plant was generated through CRISPR/Cas9 system. Guide RNAs (sgRNA) "GAAATGGACACCGTCTGTGG" and "GAACTCCGTTTACAGAA" were inserted into pK7- <i>gfp</i> . |
| Novel plant genotypes | The Arabidopsis inbred lines for plants BrJM18 and BrJM18- <i>gfp</i> were generated in the field and in the greenhouse. Inbred lines were used for BrJM18 alleles were produced for analysis on T2 generation. The subsp. chinensis var. parachinensis (Par) BrJM18 overexpression and gene edited plants were generated by Agrobacterium-mediated transformation using cotyledonary petiole as explant. For 35S::BrJM18: <i>gfp</i> transgenic Par plants, one independent line of each BrJM18 alleles was used for analysis on T1 generation. The BrJM18 gene-edited plant was generated through CRISPR/Cas9 system. Guide RNAs (sgRNA) "GAAATGGACACCGTCTGTGG" and "GAACTCCGTTTACAGAA" were inserted into pK7- <i>gfp</i> .                                                                                                                                                                                                                                                                                                                                                                                                                    |
| Authentication        | The Arabidopsis and Par BrJM18 transgenic plants were screened using 15 mg/L hygromycin or 25 mg/L kanamycin. Transgene expression was detected by immunoblotting using anti-GFP antibody (HT801-01, TransGene, Beijing, China). For the Par BrJM18 CRISPR/Cas9 plants, the target gene BrJM18 from T0 plants was amplified, purified, and cloned into a vector using the pMD™18-T Vector Cloning Kit (Takara) for sequencing.                                                                                                                                                                                                                                                                                                                                                                                                                                                                                                                                                                                                                                                                                                                    |

## ChIP-seq

## Data deposition

- Confirm that both raw and final processed data have been deposited in a public database such as [GEO](https://www.ncbi.nlm.nih.gov/geo/).
- Confirm that you have deposited or provided access to graph files (e.g. BED files) for the called peaks.

|                                                                               |                                                                                                                                                                                                                                                                                                                                                                                                                                                                                                          |
|-------------------------------------------------------------------------------|----------------------------------------------------------------------------------------------------------------------------------------------------------------------------------------------------------------------------------------------------------------------------------------------------------------------------------------------------------------------------------------------------------------------------------------------------------------------------------------------------------|
| Data access links<br><i>May remain private before publication.</i>            | <a href="https://www.ncbi.nlm.nih.gov/geo/query/acc.cgi?acc=GSE223969">https://www.ncbi.nlm.nih.gov/geo/query/acc.cgi?acc=GSE223969</a>                                                                                                                                                                                                                                                                                                                                                                  |
| Files in database submission                                                  | GSM7008932 HCK Input; GSM7008933 LCK Input; GSM7008934 LH1 Input; GSM7008935 LH2 Input; GSM7008936 HH1 Input; GSM7008937 HH2 Input; GSM7008937 HH2 Input; GSM7008939 LCK IP; GSM7008940 LH1 IP; GSM7008941 LH2 IP; GSM7008942 HH1 IP; GSM7008943 HH2 IP. "L" represents samples were treated with NC (22?/22?, 16h/8h). "H" represents samples were treated with HS (29?/29?, 16h/8h). "CK" r represents wild type Par control. "H1" represents BrJM18PC-OX plants. "H2" represents BrJM18Par-OX plants. |
| Genome browser session<br>(e.g. <a href="https://genome.ucsc.edu/">UCSC</a> ) | <a href="http://genome.ucsc.edu/cgi-bin/hgTracks?hgsid=1718034740_vkl1DrmRiOa4mUuEAdbYguYMniJ">http://genome.ucsc.edu/cgi-bin/hgTracks?hgsid=1718034740_vkl1DrmRiOa4mUuEAdbYguYMniJ</a>                                                                                                                                                                                                                                                                                                                  |

## Methodology

|                  |                                                                                                                                                                                                                                                                                                                                                                                       |
|------------------|---------------------------------------------------------------------------------------------------------------------------------------------------------------------------------------------------------------------------------------------------------------------------------------------------------------------------------------------------------------------------------------|
| Replicates       | Two biological replicates were performed for each sample.                                                                                                                                                                                                                                                                                                                             |
| Sequencing depth | For ChIP-seq using anti-GFP antibody, the total clean reads of the Immunoprecipitated sample were 23,943,076-2,929,666. Clean bases were 4.9-3.52G. 58.32%-72.55% reads were mapped to the reference genome. Unique reads were 24.82%-29.01. And the reads were paired-end. For ChIP-seq using anti-GFP antibody, the total clean reads of Immunoprecipitated samples were 40,519,410 |

|                         |                                                                                                                                                                                                                                                                                                                                                                                                                                                                                                                                                                                                                                                                                                                                                                                                                                                                                                                                                                                                                                                                                                                                                                                                                                                                                                                                                                                                                          |
|-------------------------|--------------------------------------------------------------------------------------------------------------------------------------------------------------------------------------------------------------------------------------------------------------------------------------------------------------------------------------------------------------------------------------------------------------------------------------------------------------------------------------------------------------------------------------------------------------------------------------------------------------------------------------------------------------------------------------------------------------------------------------------------------------------------------------------------------------------------------------------------------------------------------------------------------------------------------------------------------------------------------------------------------------------------------------------------------------------------------------------------------------------------------------------------------------------------------------------------------------------------------------------------------------------------------------------------------------------------------------------------------------------------------------------------------------------------|
|                         | and 43,068,060, containing 5996225762 and 6352462960 clean bases, respectively. 65.3% and 76.59% of the reads were mapped to the reference genome. 481948 and 712279 unique reads were found. The reads were also paired-end.                                                                                                                                                                                                                                                                                                                                                                                                                                                                                                                                                                                                                                                                                                                                                                                                                                                                                                                                                                                                                                                                                                                                                                                            |
| Antibodies              | Anti-GFP antibody (ab290, Abcam). Anti-BrJMJ18 antibody (HuaBio, Hangzhou, China).                                                                                                                                                                                                                                                                                                                                                                                                                                                                                                                                                                                                                                                                                                                                                                                                                                                                                                                                                                                                                                                                                                                                                                                                                                                                                                                                       |
| Peak calling parameters | ChIP-seq experiment was carried out by IGENEBOOK Biotechnology Company (Wuhan, China) according to a previously described method (Landt et al., 2012). All parameters used are default without modification. We will confirm again with the company.                                                                                                                                                                                                                                                                                                                                                                                                                                                                                                                                                                                                                                                                                                                                                                                                                                                                                                                                                                                                                                                                                                                                                                     |
| Data quality            | Data quality is evaluated in accordance with the company's standard process. The square (R <sup>2</sup> ) of the Pearson correlation coefficient of the two biological repeats was greater than 0.8. We will contact the company for more details. For the ChIP-seq with anti-GFP antibody, about 1,000 and 4,500 peaks were at FDR 5% in the samples treated with NC and HS, respectively. For the ChIP-seq with anti-BrJMJ18 antibody, about 2,000 peaks were at FDR 5%.                                                                                                                                                                                                                                                                                                                                                                                                                                                                                                                                                                                                                                                                                                                                                                                                                                                                                                                                               |
| Software                | Immunoprecipitated DNA was used to construct sequencing libraries following the protocol provided by the I NEXTFLEX® ChIP Seq Library Prep Kit for Illumina® Sequencing (NOVA-5143-02, Bioo Scientific, Austin, TX, USA) and sequenced on Illumina Xten with the PE 150 method (Illumina Inc. San Diego, CA, USA). Trimmomatic (version 0.38) was used to filter out low-quality reads (Bolger et al., 2014). Clean reads were mapped to the B. rapa genome v3.0 using Bwa (version 0.7.15) (Li and Durbin, 2009). Samtools (version 1.3.1) was used to remove potential PCR duplicates (Li et al., 2009). MACS2 software (version 2.1.1.20160309) was used to call peaks using default parameters (bandwidth, 300 bp; model fold, 5, 50; q value, 0.05). If the summit of a peak located closest to the transcription start site (TSS) of one gene, the peak was assigned to that gene (Salmon-Divon et al., 2010). Gene Ontology (GO) enrichment analysis was performed using the EasyGO gene ontology enrichment analysis tool ( <a href="http://bioinformatics.cau.edu.cn/easygo/">http://bioinformatics.cau.edu.cn/easygo/</a> ) (Zhou and Su, 2007). The GO term enrichment was calculated using hypergeometric distribution, with a P value cutoff of 0.01. P values obtained by Fisher's exact test were adjusted by the false discovery rate (FDR) for multiple comparisons to detect overrepresented GO terms. |
